**Maternal glucocorticoids do not predict reproductive investment nor breeding success in a free-ranging bird.**

Devin Fischer<sup>1</sup>, Robby R. Marrotte<sup>1</sup>, Eunice H. Chin<sup>2,4</sup>, Smolly Coulson<sup>3</sup> and Gary Burness<sup>3\*</sup>

<sup>1</sup>Environmental and Life Sciences Graduate Program, Trent University, Peterborough, Ontario, Canada

<sup>2</sup>Department of Biological Sciences, Simon Fraser University, Burnaby, British Columbia, Canada

<sup>3</sup>Department of Biology, Trent University, Peterborough, Ontario, Canada

<sup>4</sup>Present address: Biology Department, Capilano University, North Vancouver, BC, Canada

\* Corresponding Author: [garyburness@trentu.ca](mailto:garyburness@trentu.ca)

**RUNNING TITLE:** Glucocorticoids and fitness

**KEYWORDS:** stressor, corticosterone, fitness, avian, tree swallow

**SUMMARY STATEMENT:** Maternal stress hormone levels do not predict fitness of female tree swallows.

## ABSTRACT

The hormone corticosterone (CORT)) has been hypothesized to be linked with fitness, but the directionality of the relationship is unclear. The “CORT-fitness hypothesis” proposes that high levels of CORT arise from challenging environmental conditions, resulting in lower reproductive success (a negative relationship). In contrast, the “CORT-adaptation hypothesis” suggests that, during energetically demanding periods, CORT will mediate physiological or behavioural changes that result in increased reproductive investment and success (a positive relationship). During two breeding seasons, we experimentally manipulated circulating CORT levels in female tree swallows (*Tachycineta bicolor*) prior to egg laying, and measured subsequent reproductive effort, breeding success, and maternal survival. When females were recaptured during egg incubation and again during the nestling stage, the CORT levels were similar among individuals in each treatment group, and maternal treatment had no effect on indices of fitness. By considering variation among females, we found weak support for the “CORT-adaptation hypothesis”; there was a non-significant positive relationship between CORT levels during incubation and hatching success. During the nestling stage CORT levels were unrelated to any measure of investment or success. Within the environmental context of our study, we found little support for any relationship between maternal glucocorticoid levels and indices fitness.

## INTRODUCTION

Within and among species individuals vary in the strategies used to maximise fitness, by adjusting the relative effort put into current versus future reproductive events (Williams, 2005; Hansen et al., 2016). There is ample evidence that increased energy expenditure and effort during one breeding bout results in decreased reproductive success, probability of re-nesting, or survival in subsequent bouts (Nager, 2006; Crossin et al., 2013, 2016; Harms et al., 2014; Bleu, Gamelon & Sæther, 2016; Henderson et al., 2017).

Glucocorticoids (GCs) have been hypothesized to be a mediator of the trade-off between current and future reproduction (Wingfield et al., 1998; Bleu, Gamelon & Sæther, 2016; Hansen et al., 2016). GCs are metabolic hormones that fluctuate daily with feeding and other activities, and under resting conditions regulate energy balance (Landys, Ramenofsky & Wingfield, 2006; Wilcoxon et al., 2011; Hau & Goymann, 2015). In response to an environmental stressor, GC levels increase rapidly, resulting in increased availability of metabolic substrates, and adjustment of behaviors toward immediate survival (Wingfield & Sapolsky, 2003; Romero, 2004) while inhibiting reproductive behaviour and physiology (Sapolsky, Romero & Munck, 2000; Dantzer et al., 2014), i.e. the CORT-trade-off hypothesis (Patterson et al., 2014).

GCs are thought to play a role in translating environmental cues into adaptive physiological responses. In birds, the dominant GC is corticosterone (hereafter, CORT), and an elevation of baseline CORT levels may signal a poor quality environment or an individual in poor condition (Bonier et al., 2009b). Following this reasoning, Bonier et al (2009a) formulated “the CORT-fitness hypothesis,” which predicts that individuals with higher circulating CORT levels would have lower fitness. In support of this, higher baseline CORT levels have been

negatively associated with habitat quality, body condition, hatching success, and fledging success across various species, e.g. blue tits *Cyanistes caeruleus* (Henderson et al., 2017); tree swallows *Tachycineta bicolor* (Patterson, Winkler & Breuner, 2011); barn swallows *Hirundo rustica* (Saino et al., 2005); Adelie penguins *Pygoscelis adeliae* (Thierry, Ropert-coudert & Raclot, 2013).

In contrast, a positive relationship is predicted by “the CORT-adaptation hypothesis.” This hypothesis suggests that because CORT can mediate the mobilization of fuels, causing changes in behaviour or physiology that can increase investment in reproduction, elevated CORT will lead to higher fitness during energetically demanding times (Wingfield & Sapolsky, 2003; Bonier et al., 2009a). Indeed, across a variety of species and life history strategies individuals with higher reproductive success have been reported to have higher CORT levels, e.g. eastern bluebirds *Sialia sialis* (Burtka, Lovern & Grindstaff, 2016); black-legged kittiwakes *Rissa tridactyla* (Chastel, Weimerskirch & Wing, 2005); petrels *Macronectes* spp (Crossin et al., 2013); western bluebirds *S. mexicana* (Kleist et al., 2018); mourning doves *Zenaida macroura* (Miller, Vleck & Otis, 2009).

In fact, there may exist no consistent relationship between CORT and fitness, due to a variety of factors masking directionality (Madliger & Love, 2016a). For example, a lack of relationship could be due to different functions of CORT; when resources are plentiful, elevated CORT could stimulate energy mobilization and parental provisioning; however, CORT could also be elevated in parents experiencing stressors (Vitousek, Jenkins & Safran, 2014). Even within a breeding season, different stages can have differing parental energetic requirements presumably requiring different levels of GC-mediated energy mobilization (Humphreys, Wanless & Bryant, 2006; Nager, 2006; Tulp et al., 2009; Sakaluk, Thompson & Bowers, 2018).

Most studies that have explored relations between CORT and fitness have been correlative. Although such studies are certainly informative, e.g. (Bonier et al., 2009b), studies that manipulate CORT levels directly, and explore the resultant parental response are also needed. Using tree swallows as a model organism, we attempted to elevate maternal CORT experimentally prior to egg-laying, and quantify subsequent variation in maternal reproductive investment and reproductive success over two breeding seasons. We asked two primary questions: (1) How does maternal CORT influence reproductive investment and success? (2) Does the directionality of the relationship between maternal CORT and reproductive investment and success change between the incubation and nestling provisioning stages, given the increased energy expenditure and brood value during chick provisioning? If the CORT-fitness hypothesis were supported, we expected to detect a negative relationship between maternal CORT and measures of reproductive investment and success. Conversely, if the CORT-adaptation hypothesis were supported, we expected to see a positive relationship between maternal CORT and reproductive investment and success.

## **MATERIALS AND METHODS**

### **Study location and species**

All protocols were approved by Trent University Animal Care Committee, with a handling, banding and collection permit provided by Canadian Wildlife Service, Environment Canada. Our study took place during spring and summer 2015 and 2016, using tree swallows, a small, migratory, aerial insectivore, that breeds across central and northern North America (Winkler et al., 2011). They are cavity nesters that readily occupy artificial nest boxes, and both sexes begin nest building in late April to early May, with laying occurring through May and June. Most

populations lay only one clutch of 5 or 6 eggs per season; the female then incubates the eggs for about 14 days. Chicks are fed by both parents and fledge at approximately 21 days post-hatch.

We had two field sites near Peterborough Ontario, Canada (University Nature Area: 44° 21' N, 78° 17' W; and Lakefield Township Sewage Lagoon: 44° 25' N, 78° 15' W). In 2015 and 2016, the Nature Area had 66 and 70 boxes, respectively; Sewage Lagoon had 50 and 52 nest boxes. The Nature Area consisted of open woodland with long grasses, shrubs, and scattered apple (*Malus pumila*), buckthorn (*Rhamnus cathartica*), red cedar (*Juniperus virginiana*), white cedar (*Thuja occidentalis*), and dogwood (*Cornus florida*). The immediate landscape around boxes at the Sewage Lagoon was exposed soil and grasses; the greater surrounding area was farmland consisting of both crop and pasture land. Nest boxes at the Sewage Lagoon were 5 to 10 metres from the water.

## **Experimental manipulation of maternal corticosterone levels**

Nest boxes were monitored daily beginning 6 May in both years. When nests were about 75% formed (when cup-shaped or when feathers were present), we captured females using cardboard trapdoors over the nest box opening, or by surprising birds sitting in nest boxes. In 2015, nine females were caught at night (between 2200 and 2400 hours) by surprising birds sitting in nest boxes (no females were found in nest boxes at night in 2016). Upon capture, females were randomly assigned to CORT or sham treatment groups (Table 1). We sterilized the skin of the right flank with 70% ethanol, made a 4mm subcutaneous incision, and inserted a sterilized 10mm silastic tube (ID 1.47mm and OD 1.96mm, Dow Corning 508-006) filled with crystalline CORT (Sigma Aldrich C2505) that was sealed with silicone sealant (732 Dow Corning) at both ends (CORT treatment). To each implant we added a single hole using a 30 G needle (Ouyang et al.,

2013). Sham treatment birds received sterilized empty implants. Empty implants weighed approximately 0.02g and held an average of  $0.007\text{g} \pm 0.0007\text{g}$  of CORT. Once the implant was inserted, the incision in the skin was sealed with a drop of 3M Vetbond (no. 1469SB). Each female was then aged as second year, SY, or after-second year, ASY (Pyle et al., 1987). Flattened wing length was measured with a standard ruler with a wing stop ( $\pm 1\text{mm}$ ), mass was measured with a Pesola spring scale ( $\pm 0.25\text{g}$ ). All birds (including any males caught inadvertently) were banded with a federal aluminum numbered leg band (Canadian Wildlife Service) and released. Birds were held for no more than 10 minutes before release. In 2016 and 2017, any previously banded female from 2015 or 2016 was counted as a returned bird in the return rate analysis regardless of whether they hatched a clutch that year.

We allocated females to the Control group if they were not caught prior to laying, either because they did not enter the nest box while it had a trap, or because they began laying earlier than we expected. Although these females did not receive an implant before egg laying they were handled and measured beginning during incubation (sample sizes in Table 1).

### **Nest and egg monitoring**

Nest boxes were monitored daily throughout the nest-building and laying period, and when eggs were discovered, eggs were numbered with a black marker and weighed ( $\pm 0.01\text{ g}$ ) using a digital balance. One female had a lay date of 4 June, which was greater than 3 standard deviations from the population mean (21 May). We did not consider this female further because we suspected it was re-nesting after a failed first attempt. All other nests were included in statistical analyses.

## **Nestling measurements**

Beginning on day 12 of incubation (incubation day 0 = first day no new eggs were laid, and eggs were warm to the touch), nest boxes were checked twice daily. The hatch day of the first nestling was defined as day 0 for that nest. It was not possible to match nestlings to egg identity. We marked the talons of nestlings with coloured nail polish to distinguish individuals, until we banded them on day 10 post-hatch with aluminum numbered leg bands (Canadian Wildlife Service). Nestlings were weighed at hatch with an egg scale ( $\pm 0.01\text{g}$ ), and on days 3, 7, 10, 13, and 14 post-hatch with a Pesola spring scale ( $\pm 0.25\text{g}$ ). Beginning on day 18 post-hatch, we checked nest boxes daily by partially opening the door to determine fledging success. To guard against pre-mature fledging, the nest box opening was blocked for 1 minute after checking, and when the blocking was removed the box was observed for 5 min from a distance of a few metres; no instances of premature fledging were observed.

## **Blood sampling procedure**

We recaptured adult females in nest boxes between day 2 and 5 of incubation (both years) and between day 3 and 6 post-hatch during chick rearing (in 2016 only) between 0600 and 1200 hours. Upon capture, we collected a 100 $\mu\text{l}$  blood sample from the brachial vein using a micro-capillary tube within three minutes of the female entering the nest box. The mean time taken to draw blood ( $\pm\text{SE}$ ) was  $118 \pm 5\text{s}$  ( $N=57$ ) during incubation, and  $115 \pm 8\text{s}$  ( $N=33$ ) during the nestling stage. Blood samples were kept on ice for up to eight hours. Samples were then centrifuged for four minutes at 19,200  $\times g$  (Thermo IEC Micro-MB) before plasma and red blood cells were frozen separately at  $-80^\circ\text{C}$ . Prior to release, we recorded female body mass and marked the tail feathers and right primaries with a spot of white acrylic paint to distinguish



females from males during subsequent behavioural observations (Whittingham, Dunn & Clotfelter, 2003; Bonier, Moore & Robertson, 2011). If the female had not been captured previously (i.e., she was to become a Control female), upon first capture during incubation we recorded her head-bill length and wing length, and banded her.

We collected nestling blood samples (50µl) from the brachial vein on days 7 or 8, and 13 post-hatch. Samples taken on day 7 or 8 post-hatch were for molecular sexing and were added to 1ml of lysis buffer in the field and subsequently stored at -20°C. Samples collected on day 13 were centrifuged and plasma was stored at -80°C (as part of a separate study).

# **Adult behavioural observation**

On day 7 or 8 post-hatch between 0830 and 1400 hours, nest boxes were observed from a distance of 10 m for 1 hr (Lendvai et al., 2015), during which we counted the number of visits made by males and females to the nest box. This was the maximum distance at which it was still possible to distinguish the sex of the adult entering the box through binoculars. Observations made mid-day have been shown to provide the best estimates of feeding rate, although 1-hour observations periods done at any time of day predict total daily feeding rates (Lendvai et al., 2015)

# **Lab procedures**

## *Corticosterone radioimmunoassay*

Plasma samples were analyzed for total corticosterone in duplicate using a <sup>125</sup>I radioimmunoassay (MP Biomedicals #07120103) following the manufacturer's instructions (Washburn et al., 2002). Plasma was diluted 1:25 (10µl of plasma plus 240µl of assay buffer).

Samples that were not detectable were set to the lowest point on the standard curve (3.125 ng/ml), following Hogle and Burness (2014). We did not extract plasma because a serial dilution of non-extracted plasma pooled from five individuals was parallel to the standard curve. A total of 23 individual assays was performed. The average inter-assay variation was 7.99%; the intra-assay variation was 10.7%.

### *Molecular sexing protocol*

Nestling blood samples taken on day 7 or 8 post-hatch were used for genetic sexing using the CHD1W and CHD1Z genes (Fridolfsson & Ellegren, 1999; Hogle & Burness, 2014). DNA extraction was done using DNEasy blood and tissue kits (Qiagen 69506). A touchdown PCR procedure was used with 10ul volumes consisting of 1.2ul 10X buffer, 0.4ul MgCl<sub>2</sub>, 1.0ul dNTP, 0.25ul BSA, 0.2ul each of primers 2550 and 2718 (Fridolfsson and Ellegren, 1999), 1.0ul Taq polymerase, 3.75ul H<sub>2</sub>O, and 2ul DNA in an Eppendorf thermocycler. Initial denaturing began at 94°C for 5 min followed by a touchdown sequence where the annealing temperature was lowered 1°C per cycle from 94° to 50°C. A further 24 cycles were run with a denaturing temperature of 94°C for 30 s, annealing temperature of 40°C for 30 s and extension of 72°C for 30 s, followed by a final extension at 72°C for 2 min after the last cycle. PCR products were separated in a 3% agarose gel stained with ethidium bromide and run in 1X TBE buffer. Each gel was run with known male and female adult samples for comparison (N=273 chicks).

### **Statistical analyses**

All data will be deposited in the DataDryad data repository. We used R version 3.4.3 (2017) to run all analyses, and statistical significance was claimed at  $P < 0.05$ . During field work we were

generally blind to the experimental treatment, but not during statistical analysis. Sample sizes were determined by the number of breeding individuals in our study population that could be captured. To improve normality, all CORT values were  $\log_e$  transformed; all other metrics were untransformed. Raw means are reported  $\pm$  SE. Sample sizes varied among analyses because we were not always able to collect all measurements from all individuals. We included ‘year’ as a factor only in analyses of maternal CORT during incubation (CORTinc), because during the nesting phase (CORTnest) we measured CORT in one year only (2016).

We constructed our statistical models including only main effects that were of likely biological importance; as such, not all two-way interactions were included. We report outputs from global statistical models. Because we had explicit hypotheses, and because none of our response variables was correlated, we did not to use a post-hoc correction for the number of tests performed (Perneger, 1998; Streiner, 2015).

### *Morphological and hormonal measures of adult females*

We ran preliminary tests to determine whether females that had been assigned to CORT or Sham treatment groups differed in pre-implant body mass (measured at time of implant; females in the Control group were not captured prior to incubation and thus there was no pre-implant mass measurement). To test for possible differences in body size among treatments, we compared a female’s wing length (measured pre-laying in the CORT and Sham treatments, and during early incubation in the Control females). Finally, we tested for differences in clutch initiation date in Julian days among treatments. Separate linear models (LM) were run with female pre-laying mass, wing length, and clutch initiation date as the response variable, and treatment (CORT, Sham, Control), site (Nature areas, Sewage Lagoon), year (2015, 2016), and age (Second year,

SY; After second year, ASY) as the predictors. We did not include any interactions terms as they were not of *a priori* interest.

Implanted females recaptured during incubation may have differed phenotypically from individuals that abandoned their nests (and were never recaptured). To test this, we ran a generalized linear model (GLM) with binomial errors, with recapture status (recaptured/non-recaptured) as the dependent variable, and treatment and year as the fixed effects. To test whether the total number of individuals that subsequently laid eggs differed between the CORT and Sham maternal treatment groups, we used a chi-square test (because Control females were only captured post-egg laying, they were not included in this analysis).

#### *Maternal baseline corticosterone during incubation and nestling stages*

To test whether treatment affected maternal CORT levels within each breeding stage (incubation and nestling), we used linear models (LM) with either CORT during incubation (from hereafter CORTinc) or CORT during the nestling stage (CORTnest) as the response variable and maternal treatment, age, site, sample time (time from initial contact with bird to end of blood sample), and clutch initiation date (in Julian days) as fixed effects. We had no *a priori* predictions regarding interactions, so none was included in the models.

We analyzed CORTinc and CORTnest separately because CORTnest was only measured in 2016. Baseline CORTinc measurements (N=56) had one suspected outlier (121.22 ng/ml) removed prior to analysis. This value was > 3 standard deviations from the mean; considerably higher than the 0.5 to 14 ng/ml range reported for previously (Franceschini et al., 2008; Ouyang et al., 2011; Patterson, Winkler & Breuner, 2011; Madliger et al., 2015). Preliminary analyses

were run with and without this outlier, and although no difference was found in the pattern of significance of parameters, we chose to exclude it.

### *Measures of female reproductive investment*

As indices of maternal investment during incubation we used clutch mass (summed mass of individual eggs at laying), and during the nestling phase we used maternal nest box visitation rate and nestling growth rate. To test whether a female's clutch mass correlated with her CORT levels, we used a linear model (LM) with clutch mass as the response variable and CORTinc, maternal treatment, age, site, and year as main effects. To explore investment during the nestling stage, we used a LM with the number of nest box visits per chick per hour (by the female) as the response variable and CORTnest, treatment, maternal age, site, and male nest box visits per chick per hour as fixed effects. Finally, we calculated nestling growth rate per day during the linear growth phase (Burness, Ydenberg & Hochachka, 2001) as the difference in individual mass between days 3 and 7 post-hatch, divided by 4 days. We used a linear mixed model (LMM, lmer in R package lme4) with individual chick mass gain per day as the response variable, and nest ID. Fixed effects were CORTnest, maternal treatment, maternal age, site, nestling sex. Additionally, we included an interaction between nestling sex and CORTnest.

### *Measures of female reproductive success*

To test for a relationship between CORTinc and indices of reproductive success, we used a generalized linear mixed model (GLMM; glmer in R package lme4) with binomial errors, with either hatching or fledging success as the response variable (0 or 1 for each chick) and CORTinc, maternal treatment, age, site, and year as fixed effects, and nest ID as a random effect. To

explore the relationship between CORTnest and post-hatching reproductive success, we examined individual nestling mass at day 14 post-hatch and fledging success as indices of reproductive success. To test whether nestling mass differed with maternal CORT or treatment, we used a LMM with nestling mass at day 14 as the response variable and CORTnest, maternal treatment, maternal age, and site as fixed effects (year was not included because CORTnest was measured in 2016 only), and Nest ID as a random effect. Finally, to test whether fledging success differed with maternal CORT or treatment, fledging success (0 or 1 for each chick) was used as the response variable in a GLMM with binomial errors with maternal treatment, maternal age, site, and CORTnest as fixed effects, and Nest ID as a random effect. No interaction terms were included in these analyses.

### *Measures of female survival*

We estimated female survival by using the return rates of adult females to the study sites the following spring and comparing this with CORTinc or CORTnest during the previous year in separate models. Return rate (either 0 or 1) was the response variable in a general linear model (GLM), with CORTinc (or CORTnest), treatment, year, age, site, and number of nestlings fledged as main effects. In analyses of CORTnest, “year” was not included in the model because CORTnest was only measured in a single year (2016). We also used a chi square test to determine whether there was a difference in return rate by treatment or year.

## **RESULTS**

### **Morphology and hormonal measures of adult females**

We implanted 51 females with corticosterone-filled implants (CORT), and 48 with sham implants (Sham); an additional 25 females were captured for the first time during incubation

were allocated to the Control treatment (Table 1). There was no difference in pre-egg laying body mass between females allocated to the CORT and Sham groups (treatment:  $p=0.108$ ; Table S1); females in the Control group were not captured prior to egg laying, so there was no pre-egg laying mass. Focussing on individuals that retained their implants, wing length and clutch initiation date did not differ significantly among treatments (Wing length, treatment:  $p = 0.238$ ; Clutch ignition date, treatment:  $p=0.859$ ; Table S1). There was no significant difference between the Sham and CORT treatments in the percentage of females that retained their implants and subsequently laid eggs (Sham: 40% (19 of 48), CORT: 31% (16 of 51);  $\chi^2=0.287$ ,  $df=1$ ,  $p>0.05$ ; Table 1).

There were no significant differences by year or by treatment in the number of implanted females that were recaptured during incubation (GLM: year  $F_{1,96} = 3.884$ ,  $p=0.052$ ,  $N_{2015}=26$  recapture and 33 non-recapture,  $N_{2016}=35$  recapture and 5 non-recapture; treatment  $F_{1,96} = 3.832$ ,  $p=0.053$ ,  $N_{\text{Sham}}=34$  recapture and 14 non-recapture,  $N_{\text{CORT}}=27$  recapture and 24 non-recapture). Control birds were not included in the recaptured/not recaptured analysis because they were caught for the first time during incubation.

### **Implants failed to raise long-term maternal corticosterone levels**

During incubation, females were recaptured on average 16.42 days ( $\pm 0.11$ ) after implantation (range 11 to 26 days). Contrary to expectations, when females were recaptured there was no difference in CORT levels among the 3 treatments (Treatment:  $p=0.145$ ; Table 2; Fig. 1A). Lay date (i.e., clutch initiation date) was also not a significant predictor of CORT<sub>inc</sub> ( $p = 0.629$ , Table 2). However, older mothers (ASY) had higher CORT<sub>inc</sub> levels than SY mothers (Age:  $p=0.022$ ) and levels differed between years (Year:  $p = 0.045$ , Table 2). During nestling

provisioning, maternal baseline CORT (CORTnest) did not differ among treatments (Treatment:  $p=0.118$ ; Table 2, Fig. 1B), nor with any other fixed effects (all,  $p > 0.20$ , Table 2).

### **Maternal corticosterone levels did not predict reproductive investment**

Mean clutch size ( $\pm$ SE) of females was 5.3 eggs  $\pm$  0.1 (range = 3 to 7 eggs per nest,  $N=57$  nests). Reproductive investment during laying, measured as clutch mass, did not correlate with maternal CORT levels during incubation nor with maternal treatment (CORTinc:  $p=0.348$ ; Treatment  $p=0.259$ , Table 3). Similarly, during the nestling stage, there was no relationship between either maternal CORT or treatment on the number of female nest box visits (CORTnest:  $p=0.831$ ; Treatment:  $p=0.843$ ; Table 3). Although maternal treatment did not influence nestling growth rate between days 3 and 7 ( $p = 0.730$ ), there was a marginally significant negative relationship between maternal CORTnest and nestling growth rate ( $p = 0.076$ , Table 3). Maternal age influenced nestling growth rates, with nestlings from SY mothers having higher growth rates than nestlings from ASY mothers (age:  $p<0.001$ , Table 3).

### **Maternal corticosterone levels did not predict reproductive success**

As indices of reproductive success, we measured hatching success, nestling mass at day 14 post-hatch, and fledging success. Hatching success was not significantly predicted by any of the factors we measured (Table 4). There was, however, a nonsignificant trend for mothers with higher CORT during incubation to have higher hatching success (CORTinc:  $p=0.061$ ), and for older females to have higher hatching success than younger females (age:  $p=0.093$ ; Table 4). Nestling mass at day 14 post-hatch was not predicted by either CORTnest, nor maternal



treatment (CORTnest:  $p=0.123$ ; treatment  $p=0.372$ ), although nestlings at the Nature Area site tended to be heavier (Site:  $p = 0.092$ ; Table 4).

The probability of a nestling fledging did not vary with maternal corticosterone levels measured during either incubation (Fledging success (A), CORTinc:  $p = 0.257$ ) nor the nestling phase (Fledging success (B), CORTnest:  $p = 0.590$ ). Similarly, maternal treatment had no effect on fledging success (Fledging success (A), Treatment:  $p=0.136$ ; Fledging success (B), Treatment:  $p = 0.329$ ). Fledging success was significantly higher at the Sewage Lagoon site (Fledging success (A), Site:  $p=0.042$ ; Table 4).

## **Maternal return rate was predicted by the number of fledglings but not maternal corticosterone levels**

Nineteen of 62 (31%) of experimental females (Sham, CORT or Controls) returned in the year after they were initially caught, and all returning females returned to the same breeding site where initially caught. The number of females included in the analysis differs from totals in Table 1, because only females with corticosterone measurements were included. The probability that a female returned increased with her number of fledglings in the previous year (Return rate (A):  $p=0.015$ ; Return rate (B):  $p = 0.007$ ; Table 5). There was no significant effect of CORTinc, CORTnest or maternal treatment on the likelihood of a female returning to the nest sites the following year (each,  $p > 0.50$ , Table 5). There was no significant difference by treatment or year in the number of females that returned ( $\chi^2=1.039$ ,  $df=2$ ,  $p>0.05$ ; 2015 returns: 2 Sham, 1 CORT, 3 Control; 2016 returns: 4 Sham, 5 CORT, 4 Control).

## **DISCUSSION**

Our data do not convincingly support either the CORT-fitness or the CORT-adaptation hypothesis. During egg incubation, corticosterone levels of female tree swallows were positively related (albeit non-significantly) to one measure of reproductive success. However, during the nestling stage, there was no relationship between corticosterone and indices of either reproductive investment or reproductive success. During neither period did we detect a negative relationship between CORT and fitness, as predicted by the CORT-fitness hypothesis.

### **Maternal corticosterone levels during incubation**

We tested for a relationship between maternal corticosterone levels during incubation (CORT<sub>inc</sub>) and clutch mass (as a single measure of reproductive investment), and hatching success and survival to fledging as measures of reproductive success (Bonier et al., 2009b; Schoenle et al., 2017). We found no relation between CORT<sub>inc</sub> and clutch mass, however, female tree swallows with higher CORT<sub>inc</sub> levels had greater hatching success (albeit not significantly so,  $P = 0.061$ ), but not higher fledging success. The positive relationship we detected with hatching success (if real) may be due to CORT mobilizing energy stores, and thus allowing for increased reproductive effort (Riechert, Becker & Chastel, 2014). However, positive (common terns *Sterna hirundo*) (Riechert, Becker & Chastel, 2014), negative (zebra finches) (Khan, Peters & Robert, 2016), and null relationships (red-winged blackbirds) (Schoenle et al., 2017) have all been reported between maternal CORT and hatching success. Differences in the directionality of the relationships are presumably due to various environmental factors, including weather conditions (Schoenle et al., 2017) and/or food availability (Riechert, Becker & Chastel, 2014).

A lack of relationship between CORTinc and fledging success contrasts with positive relationships reported in eastern bluebirds (Burtka et al., 2016) and blue tits (Henderson et al., 2017). However in tree swallows, both negative (Bonier et al., 2009b) and statistically non-significant (Madliger & Love, 2016a) relationships between CORTinc and number of fledglings have been reported. A positive relationship between maternal CORT during incubation and fledging success might be expected if the relationship were mediated through maternal transfer of CORT into the egg, leading to higher begging rates and body size in nestlings of mothers with higher CORT (Bowers et al., 2016). However, this would be a plausible mechanism only if CORT levels during incubation correlated with levels pre-laying, as has been found in other tree swallow populations (Ouyang, Hau & Bonier, 2011); something we did not evaluate in our study.

A positive relationship between maternal CORT and fitness (CORT-adaptation hypothesis) should emerge when CORT levels are increased to meet higher energetic demands associated with reproduction (Bonier et al., 2009a; Crossin et al., 2013; Rivers et al., 2017). During incubation, individuals may experience more unpredictable stressors than during the nestling stage (Romero, 2002). For example, challenging environmental conditions such as lower temperatures and scarcer food resources in early spring can cause a negative relationship between both temperature and foraging success and baseline CORT levels, depending on the fitness and environmental measure used (Angelier et al., 2007; Wingfield, Weimerskirch & Chastel, 2010; Ouyang et al., 2015). Because higher baseline levels may prime the body to perform better under stress, females with higher baseline CORT during incubation in our study may have been better able to meet these challenges (Romero, 2002).

# **Maternal corticosterone levels during chick rearing**

We predicted that if there were a relationship between CORT and reproductive investment and success, it would most likely emerge post-hatch, given the higher maternal energy expenditure required during chick rearing than during incubation (Nilsson & Raberg, 2001; Humphreys, Wanless & Bryant, 2006; Sakaluk, Thompson & Bowers, 2018) but see (Williams, 2018) . However, female CORT levels during chick rearing were unrelated to any measure of reproductive investment (nest box visits and and nestling growth rate) nor any measure of reproductive success (nestling mass at 14 and fledging success). Despite our inability to detect relationships, others have reported that individuals with higher baseline CORT levels during chick rearing had higher parental foraging effort, provisioning rates, and energy transfer to the nestlings, e.g. macaroni penguins *Eudyptes chrysolophus* (Crossin et al., 2012); tree swallows (Wingfield & Sapolsky, 2003; Bonier, Moore & Robertson, 2011); mourning doves (Miller, Vleck & Otis, 2009). Across studies, differences in the relationship between CORT and reproductive success may be due to various fitness measures used, the relative importance of paternal investment, or environmental variation.

While female tree swallows are solely responsible for egg incubation, nestling provisioning is shared with the male (Winkler et al., 2011). As a result, variation in paternal quality may obscure relationships between maternal CORT and investment during the nestling stage. A lack of relationship between CORT<sub>nest</sub> and female nest box visits has been found in bluebirds (Davis & Guinan, 2014) and other populations of tree swallows (Patterson, Winkler & Breuner, 2011), suggesting variation among females in their glucocorticoid levels may not directly reflect maternal behaviour. In contrast, Madliger & Love (2016b) found that higher

baseline CORT<sub>nest</sub> in female tree swallows correlated with lower rates of maternal provisioning; however, males compensated for the females' low rates by increasing their own provisioning rates such that nestlings were not affected. Similarly, Patterson et al. (2011) suggested male tree swallows could compensate for decreased provisioning of their mates, although no male compensation for reduced maternal performance has also been found (Hogle & Burness, 2014). Given the importance of male provisioning to nestling mass gain (Lendvai & Chastel, 2010; Madliger & Love, 2016b; Nomi, 2018), male nest box visits and paternal quality need to be considered when predicting a pairs' reproductive investment in a nest. Future studies should include male CORT levels, and their relationship with male feeding rates and reproductive success, as in (Ouyang et al., 2011).

The directionality of the relationship between maternal CORT and fitness varies among life stages, populations and species (e.g., Bonier et al., 2009a). Some of this variation is presumably due to the context-dependency of the CORT-fitness relationship and variation in environmental conditions (Burtka, Lovern & Grindstaff, 2016; Madliger & Love, 2016b). For example, experimental elevation of maternal CORT levels increased brood mortality in tree swallows, but only when weather conditions were benign (Ouyang et al 2015). Our inability to detect relationships between maternal hormone levels and reproductive success could be due to the influence of such factors as food availability or weather, both of which could affect body condition and reproductive success of the mother (Schoech et al., 2007; Madliger & Love, 2016a). Maternal baseline CORT may also depend on the habitat type in which female tree swallows were breeding (Madliger & Love, 2016b). While we found no difference in reproductive investment or success between the two study sites, we did find that CORT<sub>inc</sub> was higher at one of our sites (Sewage Lagoon). This suggests that while habitat may affect maternal

CORT, this does not necessarily translate into differences in reproductive investment or reproductive success. Reproductive success may perhaps be mediated by a relationship between CORT and foraging conditions (Henderson et al., 2017), which could change from incubation to the nestling stage.

# **No relationship between corticosterone and return rates**

We found no relationship between either CORT<sub>inc</sub> or CORT<sub>nest</sub> level and the probability of whether a female returned to the breeding sites the following year, as reported previously (Patterson, Winkler & Breuner, 2011; Rivers et al., 2017). One explanation is that relationship between CORT levels and return rates may be non-linear. For example, in cliff swallows (*Petrochelidon pyrrhonata*), highest return rates were seen in individuals with intermediate baseline CORT levels, which could be due to stabilizing selection on CORT levels acting against the detrimental effects of very high or low CORT (Brown et al., 2005; Bonier et al., 2009a). Additionally, environmental variables (Clark et al., 2018) or an individual's reproductive success may better predict return rates than baseline CORT: the positive effect of fledgling number on maternal return rates that we detected suggests that females with higher reproductive success are more likely to return to a certain area to breed (Bonier et al., 2009b). Thus, CORT may affect return rates and survival only indirectly, by affecting fledging success (Shitikov et al., 2017; Weegman et al., 2017).

# **Efficacy of silastic implants to raise plasma glucocorticoids**

We implanted pre-egg laying females with corticosterone-filled silastic implants, but when females were recaptured during early-to mid-incubation (mean  $\pm$  SE: 17.1 days  $\pm$  0.6 after

implantation), the baseline CORT levels of implanted birds did not differ from unmanipulated birds. Across species, silastic implants have been successfully used to raise CORT levels for anywhere from a few days (Astheimer, Buttemer & Wingfield, 2000; Hayward & Wingfield, 2004; Criscuolo et al., 2005; Martin et al., 2005; Angelier et al., 2007) to three weeks post-implantation *in vivo* (Ouyang et al., 2013) and *in vitro* (Newman et al., 2010). However, the use of implants to raise CORT levels has not been consistently successful (Crossin et al., 2012; Ouyang et al., 2013; Hau & Goymann, 2015; Lattin, Breuner & Romero, 2016). Although the implants used in our study may have failed to release CORT, this seems unlikely given that *in vitro* studies have shown that CORT continues to be released across the membrane over 4 weeks (Newman et al., 2010). More likely, the implants resulted in decreased secretion of endogenous CORT via negative feedback, or increased clearance of CORT from the blood via increased excretory activity (Newman et al., 2010; Henriksen, Groothuis & Rettenbacher, 2011; Robertson, Newman & MacDougall-Shackleton, 2015).

Rather than experimentally manipulate CORT levels via implants, an alternative approach may be to manipulate maternal condition, such as with feather clipping (Rivers et al., 2017), predator experiments (Clinchy et al., 2011; Pitk et al., 2012), or density manipulations (Bentz, Navara & Siefferman, 2013). Such an approach would encompass how maternal CORT levels change based on how each female perceives her condition/ environment, how that is reflected in blood CORT levels, and how those levels might influence the next generation (Madliger & Love, 2016a; Rivers et al., 2017).

## Conclusions

The differing directionality of relationship between CORT and fitness among studies and species raises the simple question: is there is a consistent relationship to be found among individuals

within a population? Many factors can affect both CORT and fitness, including condition (Love et al., 2005), life-history stage (Romero, 2002), weather (Pakkala et al., 2016) and habitat variability (Madliger & Love, 2016b). If it can be reasonably assumed that these will always differ among individuals, then perhaps there is no consistent relationship, and any relationship detected will always be context-dependent (Madliger & Love, 2016a). A formal meta-analysis of passerine birds, such as was done recently in seabirds (Sorenson et al., 2017), may help clarify patterns.

The use of integrative measures of CORT may be an alternative way to improve our understanding of the relationship between CORT and fitness. By measuring CORT deposited in feathers during growth, or metabolites excreted in feces, it may be possible to infer CORT levels over multiple days of the incubation or nestling stage (Lucas et al., 2006; Bortolotti et al., 2008; Romero & Fairhurst, 2016). For example, giant petrels that successfully bred had higher feather CORT levels than failed breeders, but were less likely to breed the following year, a pattern which was not observed using plasma CORT from these same individuals (Crossin et al., 2013). Ideally, studies could be extended over the winter, as has been done recently in adult tree swallows (Vitousek et al., 2018). This would help elucidate the longer-term effects of maternal CORT on offspring and maternal and fitness.

## **FUNDING**

Funding was provided by the Natural Sciences and Engineering Research Council (NSERC) Canada, the Canadian Foundation for Innovation and the Ontario Innovation Trust.

## **ACKNOWLEDGEMENTS**



546 We thank Noah Ben-Ezra, Chantelle Penney and Aleesa Manax for their many hours of help in  
547 the field. Erica Nol, Joe Nocera, and Jeff Bowman provide numerous for suggestions for  
548 improving the clarity of an earlier draft of the manuscript.

549

550 **COMPETING INTERESTS**

551 The authors declare no competing or financial interests.

## LITERATURE CITED

- Angelier F, Clement-chastel C, Gabrielsen G, Chastel O. 2007. Corticosterone and time–activity budget: An experiment with black-legged kittiwakes. *Hormones and Behavior* 52:482–491. DOI: 10.1016/j.yhbeh.2007.07.003.
- Astheimer LB, Buttemer WA, Wingfield JC. 2000. Corticosterone treatment has no effect on reproductive hormones or aggressive behavior in free-living male tree sparrows, *Spizella arborea*. *Hormones and Behavior* 37:31–39. DOI: 10.1006/hbeh.1999.1555.
- Bentz AB, Navara KJ, Siefferman L. 2013. Phenotypic plasticity in response to breeding density in tree swallows: An adaptive maternal effect? *Hormones and Behavior* 64:729–736. DOI: 10.1016/j.yhbeh.2013.08.009.
- Bleu J, Gamelon M, Sæther B. 2016. Reproductive costs in terrestrial male vertebrates: insights from bird studies. *Proceedings of the Royal Society B-Biological Sciences* 283:1–9.
- Bonier F, Martin PR, Moore IT, Wingfield JC. 2009a. Do baseline glucocorticoids predict fitness? *Trends in Ecology & Evolution* 24:634–642. DOI: 10.1016/j.tree.2009.04.013.
- Bonier F, Moore IT, Martin PR, Robertson RJ. 2009b. The relationship between fitness and baseline glucocorticoids in a passerine bird. *General and Comparative Endocrinology* 163:208–213. DOI: 10.1016/j.ygcen.2008.12.013.
- Bonier F, Moore IT, Robertson RJ. 2011. The stress of parenthood? Increased glucocorticoids in birds with experimentally enlarged broods. *Biology Letters* 7:944–946. DOI: 10.1098/rsbl.2011.0391.
- Bortolotti GR, Marchant TA, Blas J, German T. 2008. Corticosterone in feathers is a long-term, integrated measure of avian stress physiology. *Functional Ecology* 22:494–500. DOI: 10.1111/j.1365-2435.2008.01387.x.

- Bowers EK, Bowden RM, Thompson CF, Sakaluk SK. 2016. Elevated corticosterone during egg production elicits increased maternal investment and promotes nestling growth in a wild songbird. *Hormones and Behavior* 83:6–13. DOI: 10.1016/j.yhbeh.2016.05.010.
- Brown CR, Brown MB, Raouf SA, Smith LC, Wingfield JC. 2005. Effects of endogenous steroid hormone levels on annual survival in cliff swallows. *Ecology* 86:1034–1046.
- Burness GP, Ydenberg RC, Hochachka PW. 2001. Physiological and biochemical correlates of brood size and energy expenditure in tree swallows. *Journal of Experimental Biology* 150:1491–1501.
- Burtka JL, Lovern MB, Grindstaff JL. 2016. Baseline hormone levels are linked to reproductive success but not parental care behaviors. *General and Comparative Endocrinology* 229:92–99. DOI: 10.1016/j.ygcen.2016.03.010.
- Chastel O, Weimerskirch H, Wing G. 2005. Modulation of prolactin but not corticosterone responses to stress in relation to parental effort in a long-lived bird. *Hormones and Behavior* 47:459–466. DOI: 10.1016/j.yhbeh.2004.10.009.
- Clark RG, Winkler DW, Dawson RD, Shutler D, Hussell DJT, Lombardo MP, Thorpe PA, Dunn PO, Whittingham LA. 2018. Geographic variation and environmental correlates of apparent survival rates in adult tree swallows *Tachycineta bicolor*. *Journal of Avian Biology* 49:1–13. DOI: 10.1111/jav.01659.
- Clinchy M, Zanette L, Charlier TD, Newman AEM, Schmidt KL. 2011. Multiple measures elucidate glucocorticoid responses to environmental variation in predation threat. *Oecologia* 166:607–614. DOI: 10.1007/s00442-011-1915-2.
- Criscuolo F, Chastel O, Bertile F, Gabrielsen GW, Maho Y Le, Raclot T. 2005. Corticosterone alone does not trigger a short term behavioural shift in incubating female common eiders

- Somateria mollissima*, but does modify long term reproductive success. *Journal of Avian Biology* 4:306–312.
- Crossin GT, Love OP, Cooke SJ, Williams TD. 2016. Glucocorticoid manipulations in free-living animals: considerations of dose delivery, life-history context and reproductive state. *Functional Ecology* 30:116–125. DOI: 10.1111/1365-2435.12482.
- Crossin GT, Phillips RA, Lattin CR, Romero LM, Williams TD. 2013. Corticosterone mediated costs of reproduction link current to future breeding. *General and Comparative Endocrinology* 193:112–120. DOI: 10.1016/j.ygcen.2013.07.011.
- Crossin GT, Trathan PN, Phillips RA, Gorman KB, Dawson A, Sakamoto KQ, Williams TD. 2012. Corticosterone predicts foraging behavior and parental care in macaroni penguins. *The American Naturalist* 180:E31–E41. DOI: 10.1086/666001.
- Dantzer B, Fletcher QE, Boonstra R, Sheriff MJ. 2014. Measures of physiological stress: a transparent or opaque window into the status, management and conservation of species ? *Conservation Physiology* 2:1–18. DOI: 10.1093/conphys/cou023.
- Davis JE, Guinan JA. 2014. Parental behavior correlates to baseline corticosterone of mates and offspring in nesting eastern bluebirds (*Sialia sialis*). *General and Comparative Endocrinology* 201:1–7. DOI: 10.1016/j.ygcen.2014.03.020.
- Franceschini MD, Custer CM, Custer TW, Reed JM, Romero LM. 2008. Corticosterone stress response in tree swallows nesting near polychlorinated biphenyl- and dioxin-contaminated rivers. *Environmental toxicology and chemistry / SETAC* 27:2326–2331. DOI: 10.1897/07-602.1.
- Fridolfsson AK, Ellegren H. 1999. A simple and universal method for molecular sexing of non-ratite birds. *Journal of Avian Biology* 30:100216.

- Hansen WK, Bate LJ, Landry DW, Chastel O, Parenteau C, Breuner CW. 2016. Feather and faecal corticosterone concentrations predict future reproductive decisions in harlequin ducks (*Histrionicus histrionicus*). *Conservation Physiology* 4:1–10. DOI: 10.1093/conphys/cow015. Published.
- Harms NJ, Legagneux P, Gilchrist HG, Love OP, Forbes MR, Bortolotti GR, Soos C, Harms NJ. 2014. Feather corticosterone reveals effect of moulting conditions in the autumn on subsequent reproductive output and survival in an Arctic migratory bird. *Proceedings of the Royal Society B-Biological Sciences* 282:20142085.
- Hau M, Goymann W. 2015. Endocrine mechanisms, behavioral phenotypes and plasticity: known relationships and open questions. *Frontiers in Zoology* 12:1–15.
- Hayward LS, Wingfield JC. 2004. Maternal corticosterone is transferred to avian yolk and may alter offspring growth and adult phenotype. *General and Comparative Endocrinology* 135:365–371. DOI: 10.1016/j.ygcen.2003.11.002.
- Henderson LJ, Evans NP, Heidinger BJ, Herborn KA, Arnold KE. 2017. Do glucocorticoids predict fitness? Linking environmental conditions, corticosterone and reproductive success in the blue tit, *Cyanistes caeruleus*. *Proceedings of the Royal Society B-Biological Sciences* 4:170875–170886.
- Henriksen R, Groothuis TG, Rettenbacher S. 2011. Elevated plasma corticosterone decreases yolk testosterone and progesterone in chickens: linking maternal stress and hormone-mediated maternal effects. *Plos One* 6:2–9. DOI: 10.1371/journal.pone.0023824.
- Hogle NC, Burness G. 2014. Sex-specific environmental sensitivity is transient in nestling Tree Swallows (*Tachycineta bicolor*). *Journal of Ornithology* 155:91–100. DOI: 10.1007/s10336-013-0991-y.

- Humphreys EM, Wanless S, Bryant DM. 2006. Stage-dependent foraging in breeding black-legged kittiwakes *Rissa tridactyla*: distinguishing behavioural responses to intrinsic and extrinsic factors. *Journal of Avian Biology* 37:436–446.
- Khan N, Peters RA, Robert K. 2016. Compensating for a stressful start : maternal corticosterone , offspring survival , and size at fledging in the Zebra Finch , *Taeniopygia guttata*. 4197. DOI: 10.1071/MU15095.
- Kleist NJ, Guralnick RP, Cruz A, Lowry CA, Francis CD. 2018. Chronic anthropogenic noise disrupts glucocorticoid signaling and has multiple effects on fitness in an avian community. *Proceedings of the National Academy of Sciences of the United States of America* 115:E648–E657. DOI: 10.5061/dryad.bt45d.
- Landys MM, Ramenofsky M, Wingfield JC. 2006. Actions of glucocorticoids at a seasonal baseline as compared to stress-related levels in the regulation of periodic life processes. *General and Comparative Endocrinology* 148:132–149. DOI: 10.1016/j.ygcen.2006.02.013.
- Lattin CR, Breuner CW, Romero LM. 2016. Does corticosterone regulate the onset of breeding in free-living birds ?: The CORT-Flexibility Hypothesis and six potential mechanisms for priming corticosteroid function. *Hormones and Behavior* 78:107–120. DOI: 10.1016/j.yhbeh.2015.10.020.
- Lendvai ÁZ, Chastel O. 2010. Natural variation in stress response is related to post-stress parental effort in male house sparrows. *Hormones and Behavior* 58:936–942. DOI: 10.1016/j.yhbeh.2010.09.004.
- Lendvai ÁZ, Ouyang JQ, Dakin R, Domalik AD, St. John PS, Stanback M, Moore IT, Bonier F. 2015. Analysis of the optimal duration of behavioral observations based on an automated continuous monitoring system in tree swallows (*Tachycineta bicolor*): Is one hour good

- enough? *PLoS ONE* 10:1–11. DOI: 10.1371/journal.pone.0141194.
- Love OP, Chin EH, Wynne-Edwards KE, Williams TD. 2005. Stress hormones: a link between maternal condition and sex-biased reproductive investment. *The American naturalist* 166:751–766. DOI: 10.1086/497440.
- Lucas JR, Freeberg TM, Egbert J, Schwabl H. 2006. Fecal corticosterone, body mass, and caching rates of Carolina chickadees (*Poecile carolinensis*) from disturbed and undisturbed sites. *Hormones and Behavior* 49:634–643. DOI: 10.1016/j.yhbeh.2005.12.012.
- Madliger CL, Love OP. 2016a. Conservation implications of a lack of relationship between baseline glucocorticoids and fitness in a wild passerine. *Ecological Applications* 26:2730–2743. DOI: 10.1002/eap.1401.
- Madliger CL, Love OP. 2016b. Do baseline glucocorticoids simultaneously represent fitness and environmental quality in a declining aerial insectivore? *Oikos* 125:1824–1837. DOI: 10.1111/oik.03354.
- Madliger CL, Semeniuk CAD, Harris CM, Love OP. 2015. Assessing baseline stress physiology as an integrator of environmental quality in a wild avian population: Implications for use as a conservation biomarker. *Biological Conservation* 192:409–417. DOI: 10.1016/j.biocon.2015.10.021.
- Martin LB, Gilliam J, Han P, Lee K, Wikelski M. 2005. Corticosterone suppresses cutaneous immune function in temperate but not tropical house sparrows, *Passer domesticus*. *General and Comparative Endocrinology* 140:126–135. DOI: 10.1016/j.ygcen.2004.10.010.
- Miller DA, Vleck CM, Otis DL. 2009. Variation in baseline and stress-induced corticosterone and prolactin levels predicts parental effort by nesting mourning doves. *Hormones and Behavior* 56:457–464. DOI: 10.1016/j.yhbeh.2009.08.001.

Nager RG. 2006. The challenges of making eggs. *Ardea* 94:323–346.

Newman AEM, MacDougall-Shackleton SA, An Y-S, Kriengwatana B, Soma KK. 2010.

Corticosterone and dehydroepiandrosterone have opposing effects on adult neuroplasticity in the avian song control system. *The Journal of Comparative Neurology* 518:3662–3678. DOI: 10.1002/cne.22395.

Nilsson J-A, Raberg L. 2001. The resting metabolic cost of egg laying and nestling feeding in great tits. *Oecologia* 128:187–192. DOI: 10.1007/s004420100653.

Nomi D. 2018. Male feeding contribution facilitates multiple brooding in a biparental songbird. *Ibis* 160:293–300. DOI: 10.1111/ibi.12540.

Ouyang JQ, Hau M, Bonier F. 2011. Within seasons and among years: When are corticosterone levels repeatable? *Hormones and Behavior* 60:559–564. DOI: 10.1016/j.yhbeh.2011.08.004.

Ouyang JQ, Lendvai ÁZ, Dakin R, Domalik AD, Fasanello VJ, Vassallo BG, Haussmann MF, Moore IT, Bonier F. 2015. Weathering the storm: parental effort and experimental manipulation of stress hormones predict brood survival. *BMC Evolutionary Biology* 15:1–8. DOI: 10.1186/s12862-015-0497-8.

Ouyang JQ, Muturi M, Quetting M, Hau M. 2013. Small increases in corticosterone before the breeding season increase parental investment but not fitness in a wild passerine bird. *Hormones and Behavior* 63:776–781. DOI: 10.1016/j.yhbeh.2013.03.002.

Ouyang JQ, Sharp PJ, Dawson A, Quetting M, Hau M. 2011. Hormone levels predict individual differences in reproductive success in a passerine bird. *Proceedings of the Royal Society of London B* 278:2537–2545. DOI: 10.1098/rspb.2010.2490.

Pakkala JJ, Norris DR, Sedinger JS, Newman AEM. 2016. Experimental effects of early-life



- corticosterone on the hypothalamic – pituitary – adrenal axis and pre-migratory behaviour in a wild songbird. *Functional Ecology* 30:1149–1160. DOI: 10.1111/1365-2435.12603.
- Patterson SH, Hahn TP, Cornelius JM, Breuner CW. 2014. Natural selection and glucocorticoid physiology. *Journal of Evolutionary Biology* 27:259–274. DOI: 10.1111/jeb.12286.
- Patterson SH, Winkler DW, Breuner CW. 2011. Glucocorticoids, individual quality and reproductive investment in a passerine bird. *Animal Behaviour* 81:1239–1247. DOI: 10.1016/j.anbehav.2011.03.012.
- Perneger T V. 1998. What’s wrong with Bonferroni adjustments. *British Medical Journal* 316:1236–1238.
- Pitk M, Tilgar V, Kilgas P, Mänd R. 2012. Acute stress affects the corticosterone level in bird eggs: A case study with great tits (*Parus major*). *Hormones and Behavior* 62:475–479. DOI: 10.1016/j.yhbeh.2012.08.004.
- Pyle P, Howell SNG, Yuick RP, DeSante DF. 1987. Identification Guide to North American Passerines. *Slate Creek Press, Bolinas, California*.
- Riechert J, Becker PH, Chastel O. 2014. Predicting reproductive success from hormone concentrations in the common tern (*Sterna hirundo*) while considering food abundance. *Oecologia* 176:715–727. DOI: 10.1007/s00442-014-3040-5.
- Rivers JW, Newberry GN, Schwarz CJ, Ardia DR. 2017. Success despite the stress: Violet-green swallows increase glucocorticoids and maintain reproductive output despite experimental increases in flight costs. *Functional Ecology* 31:235–244. DOI: 10.1111/1365-2435.12719.
- Robertson BD, Newman AEM, MacDougall-Shackleton SA. 2015. Perils and pitfalls of manipulating glucocorticoids with silicone implants. *SCIB annual meeting abstracts* e154:27.6.

- Romero LM. 2002. Seasonal changes in plasma glucocorticoid concentrations in free-living vertebrates. *General and Comparative Endocrinology* 128:1–24.
- Romero LM. 2004. Physiological stress in ecology: Lessons from biomedical research. *Trends in Ecology and Evolution* 19:249–255. DOI: 10.1016/j.tree.2004.03.008.
- Romero LM, Fairhurst GD. 2016. Measuring corticosterone in feathers : Strengths, limitations, and suggestions for the future. *Comparative Biochemistry and Physiology Part A: Molecular & Integrative Physiology* 202:112–122. DOI: 10.1016/j.cbpa.2016.05.002.
- Saino N, Romano M, Ferrari RP, Martinelli R, Møller AP. 2005. Stressed mothers lay eggs with high corticosterone levels which produce low-quality offspring. *journal of experimental zoology* 303A:998–1006. DOI: 10.1002/jez.a.224.MATERNAL.
- Sakaluk SK, Thompson CF, Bowers EK. 2018. Experimental manipulation of incubation period reveals no apparent costs of incubation in house wrens. *Animal Behaviour* 137:169–177. DOI: 10.1016/j.anbehav.2018.01.006.
- Sapolsky RM, Romero LM, Munck AU. 2000. How do glucocorticoids influence stress responses ? Integrating permissive, suppressive, stimulatory, and preparative actions. *Endocrine Reviews* 21:55–89.
- Schoech SJ, Bowman R, Bridge ES, Boughton RK. 2007. Baseline and acute levels of corticosterone in Florida Scrub-Jays (*Aphelocoma coerulescens*): Effects of food supplementation, suburban habitat, and year. *General and Comparative Endocrinology* 154:150–160. DOI: 10.1016/j.ygcen.2007.05.027.
- Schoenle LA, Dudek AM, Moore IT, Bonier F. 2017. Red-winged blackbirds (*Agelaius phoeniceus*) with higher baseline glucocorticoids also invest less in incubation and clutch mass. *Hormones and Behavior* 90:1–7. DOI: 10.1016/j.yhbeh.2017.02.002.

- Shitikov DA, Vaytina TM, Makarova T V, Fedotova SE, Krasnykh NA, Yurchenko YA. 2017. Breeding success affects the apparent survival of grassland passerines. *Biology Bulletin* 44:1046–1055. DOI: 10.1134/S1062359017090138.
- Sorenson GH, Dey CJ, Madliger CL, Love OP. 2017. Effectiveness of baseline corticosterone as a monitoring tool for fitness: a meta-analysis in seabirds. *Oecologia* 183:353–365. DOI: 10.1007/s00442-016-3774-3.
- Streiner DL. 2015. Best (but oft-forgotten) practices: the multiple problems of multiplicity — whether and how to correct for many statistical tests. *American Journal of Clinical Nutrition* 102:721–728. DOI: 10.3945/ajcn.115.113548.1.
- Thierry A-M, Ropert-coudert Y, Raclot T. 2013. Elevated corticosterone levels decrease reproductive output of chick-rearing Adélie penguins but do not affect chick mass at fledging. *conservation physiology* 1:1–12. DOI: 10.1093/conphys/cot007.
- Tulp I, Bruinzeel LW, Jukema J, Visser GH. 2009. Energetic demands during incubation and chick rearing in a uniparental and a biparental shorebird breeding in the high arctic. *The Auk* 126:155–164.
- Vitousek MN, Jenkins BR, Safran RJ. 2014. Stress and success: Individual differences in the glucocorticoid stress response predict behavior and reproductive success under high predation risk. *Hormones and Behavior* 66:812–819. DOI: 10.1016/j.yhbeh.2014.11.004.
- Vitousek MN, Taff CC, Hallinger KK, Zimmer C. 2018. Hormones and fitness: evidence for trade-offs in glucocorticoid regulation across contexts. *Frontiers in Ecology and Evolution* 6:1–14. DOI: 10.3389/fevo.2018.00042.
- Washburn BE, Morris DL, Millspaugh JJ, Faaborg J, Schulz JH. 2002. Using a commercially available radioimmunoassay to quantify corticosterone in avian plasma. *the Condor*

104:558–563.

- Weegman MD, Arnold TW, Dawson RD, Winkler DW, Clark RG. 2017. Integrated population models reveal local weather conditions are the key drivers of population dynamics in an aerial insectivore. *Oecologia* 185:119–130. DOI: 10.1007/s00442-017-3890-8.
- Whittingham LA, Dunn PO, Clotfelter ED. 2003. Parental allocation of food to nestling tree swallows: the influence of nestling behaviour, sex and paternity. *Animal Behaviour* 65:1203–1210. DOI: 10.1006/anbe.2003.2178.
- Wilcoxon TE, Boughton RK, Bridge ES, Rensel MA, Schoech SJ. 2011. Age-related differences in baseline and stress-induced corticosterone in Florida scrub-jays. *General and Comparative Endocrinology* 173:461–466. DOI: 10.1016/j.ygcen.2011.07.007.
- Williams TD. 2005. Mechanisms underlying the costs of egg production. *BioScience* 55:39–48.
- Williams TD. 2018. Physiology, activity and costs of parental care in birds. *Journal of Experimental Biology* 221:169433. DOI: 10.1242/jeb.169433.
- Wingfield JC, Maney DL, Breuner CW, Jacobs JD, Lynn S, Ramenofsky M, Richardson RD. 1998. Ecological bases of hormone-behavior interactions: The “emergency life history stage.” *American Zoologist* 206:191–206.
- Wingfield JC, Sapolsky RM. 2003. Reproduction and resistance to stress: when and how. *Journal of neuroendocrinology* 15:711–724. DOI: 10.1046/j.1365-2826.2003.01033.x.
- Wingfield JC, Weimerskirch H, Chastel O. 2010. Hormonal correlates of individual quality in a long-lived bird: a test of the ‘corticosterone – fitness hypothesis.’ *Biology Letters* 6:846–849.
- Winkler DW, Hallinger KK, Ardia DR, Robertson B, Stutchbury J, Cohen RR. 2011. Tree Swallow (*Tachycineta bicolor*) version 2.0. Birds of North America (P.G. Rodewald,

editor). *Cornell Lab of Ornithology, Ithaca* New York.

**Table 1. Sample sizes of adult female tree swallows allocated to each maternal treatment group across two years.**

|                                               | <b>Sham</b> |         | <b>CORT</b> |         | <b>Control</b> |     |
|-----------------------------------------------|-------------|---------|-------------|---------|----------------|-----|
|                                               | SY          | ASY     | SY          | ASY     | SY             | ASY |
| Number of females implanted                   | 15          | 33      | 17          | 34      | -              | -   |
| Number of females that laid                   | 3 (8)       | 16 (26) | 4 (6)       | 12 (21) | 11             | 14  |
| Number of females that laid eggs that hatched | 2 (7)       | 16 (25) | 4 (5)       | 12 (18) | 9              | 14  |

Sham: females had an empty silastic implant; CORT: females had a silastic implant filled with crystalline corticosterone; Control: females had no implant.

Female age: SY (second-year); ASY (after second-year).

Bracketed values represent total number of individuals handled/implanted; non-bracketed values indicate sample sizes of birds with implants that were still present when the bird was recaptured during incubation.

**Table 2. Factors contributing to variation in corticosterone levels in female tree swallows during incubation (CORTinc) and the nestling stage (CORTnest).**

| Response variable   | Fixed effects       | $\beta$ | SE    | df    | F     | P            | R <sup>2</sup> |
|---------------------|---------------------|---------|-------|-------|-------|--------------|----------------|
| CORTinc<br>(ng/ml)  | Intercept           | 4.541   | 3.172 | 1, 43 | 2.049 | 0.160        | 0.225          |
|                     | Treatment (CORT)    | -0.068  | 0.268 | 2, 43 | 2.021 | 0.145        |                |
|                     | Treatment (Control) | 0.452   | 0.270 | 2, 43 | 2.021 | 0.145        |                |
|                     | Age                 | 0.773   | 0.326 | 1, 43 | 5.611 | <b>0.022</b> |                |
|                     | Lay date            | -0.011  | 0.023 | 1, 43 | 0.237 | 0.629        |                |
|                     | Site (Nature Area)  | -0.487  | 0.251 | 1, 43 | 3.765 | 0.054        |                |
|                     | Sample time         | -0.004  | 0.004 | 1, 43 | 0.865 | 0.357        |                |
|                     | Year                | -0.598  | 0.289 | 1, 43 | 4.274 | <b>0.045</b> |                |
| CORTnest<br>(ng/ml) | Intercept           | 6.526   | 3.632 | 1, 23 | 3.229 | 0.085        | 0.086          |
|                     | Treatment (CORT)    | 0.304   | 0.333 | 2, 23 | 2.354 | 0.118        |                |
|                     | Treatment (Control) | 0.304   | 0.333 | 2, 23 | 2.354 | 0.118        |                |
|                     | Age                 | -0.287  | 0.542 | 1, 23 | 0.280 | 0.602        |                |
|                     | Lay date            | -0.032  | 0.025 | 1, 23 | 1.585 | 0.211        |                |
|                     | Site (Nature Area)  | 0.224   | 0.365 | 1, 23 | 0.375 | 0.546        |                |
|                     | Sample time         | 0.005   | 0.004 | 1, 23 | 1.596 | 0.219        |                |

Year was not included for CORTnest, because data were collected in a single year.  
Statistically significant main effects are in bold.

**Table 3. Factors contributing to variation in reproductive investment in female tree swallows.**

| Measures of maternal investment                                          | Fixed effects                  | $\beta$ | SE    | df     | F or $\chi^2$ | P                | R <sup>2</sup>         |
|--------------------------------------------------------------------------|--------------------------------|---------|-------|--------|---------------|------------------|------------------------|
| Clutch mass (g)                                                          | Intercept                      | 0.907   | 1.230 | 1, 44  | 54.385        | <0.001           | 0.157                  |
|                                                                          | CORTinc                        | 0.407   | 0.429 | 1, 44  | 0.900         | 0.348            |                        |
|                                                                          | Treatment (CORT)               | 0.156   | 0.734 | 2, 44  | 1.392         | 0.259            |                        |
|                                                                          | Treatment (Control)            | -0.075  | 0.774 | 2, 44  | 1.392         | 0.259            |                        |
|                                                                          | Maternal age                   | 1.176   | 0.767 | 1, 44  | 2.530         | 0.132            |                        |
|                                                                          | Site (Nature Area)             | -0.868  | 0.666 | 1, 44  | 1.701         | 0.199            |                        |
|                                                                          | Year                           | -1.058  | 0.674 | 1, 44  | 2.563         | 0.124            |                        |
| Nest box visits (per chick per hour)                                     | Intercept                      | 1.624   | 1.082 | 1, 20  | 2.253         | 0.149            | 0.009                  |
|                                                                          | CORTnest                       | 0.076   | 0.350 | 1, 20  | 0.047         | 0.831            |                        |
|                                                                          | Treatment (CORT)               | 0.130   | 0.539 | 2, 20  | 0.172         | 0.843            |                        |
|                                                                          | Treatment (Control)            | 0.350   | 0.596 | 2, 20  | 0.172         | 0.843            |                        |
|                                                                          | Site (Nature Area)             | 0.668   | 0.501 | 1, 20  | 1.777         | 0.197            |                        |
|                                                                          | Male visits per chick per hour | 0.376   | 0.273 | 1, 20  | 1.897         | 0.184            |                        |
|                                                                          | Maternal age                   | -0.181  | 0.578 | 1, 20  | 0.098         | 0.758            |                        |
| Growth rate (mass gain per chick per day from day 3 to day 7 post-hatch) | Intercept                      | 3.028   | 0.388 | 1, 113 | 60.891        | <0.001           | (M) 0.270<br>(C) 0.599 |
|                                                                          | CORTnest                       | -0.244  | 0.137 | 1, 113 | 3.144         | 0.076            |                        |
|                                                                          | Treatment (CORT)               | 0.048   | 0.190 | 2, 113 | 0.630         | 0.730            |                        |
|                                                                          | Treatment (Control)            | -0.107  | 0.194 | 2, 113 | 0.630         | 0.730            |                        |
|                                                                          | Site (Nature Area)             | 0.154   | 0.180 | 1, 113 | 0.733         | 0.392            |                        |
|                                                                          | Maternal age                   | 0.831   | 0.216 | 1, 113 | 14.849        | <b>&lt;0.001</b> |                        |
|                                                                          | Nestling sex (male)            | -0.196  | 0.316 | 1, 113 | 0.382         | 0.536            |                        |
|                                                                          | CORTnest x nestling sex        | 0.119   | 0.113 | 1, 113 | 0.945         | 0.331            |                        |

CORTinc and CORTnest refer to maternal CORT levels during incubation and the nestling stage, respectively.

Year was not included in analyses of Nest box visits or Growth rate, because CORTnest was measured in a single year only.

Adjusted R<sup>2</sup> values are provided for models without random effects; marginal (M) and conditional (C) R<sup>2</sup> values are provided for models with random effects.

Statistically significant main effects are in bold.



**Table 4. Factors contributing to variation in reproductive success in female tree swallows.**

| Measures of maternal reproductive success | Fixed effects       | $\beta$ | SE    | df     | F or $\chi^2$ | P            | R <sup>2</sup> |
|-------------------------------------------|---------------------|---------|-------|--------|---------------|--------------|----------------|
| Hatching success                          | Intercept           | -0.073  | 1.191 | 1, 257 | 0.004         | 0.951        | (M) 0.248      |
|                                           | CORTinc             | 0.779   | 0.416 | 1, 257 | 3.503         | 0.061        | (C) 0.554      |
|                                           | Treatment (CORT)    | 0.952   | 0.799 | 2, 257 | 2.830         | 0.243        |                |
|                                           | Treatment (Control) | -0.455  | 0.783 | 2, 257 | 2.830         | 0.243        |                |
|                                           | Site (Nature Area)  | -0.869  | 0.667 | 1, 257 | 1.696         | 0.193        |                |
|                                           | Year                | -0.172  | 0.701 | 1, 257 | 0.060         | 0.806        |                |
|                                           | Age                 | 1.338   | 0.796 | 1, 257 | 2.826         | 0.093        |                |
| Nestling mass at day 14 post-hatch        | Intercept           | 22.823  | 1.051 | 1, 115 | 472.161       | <0.001       | (M) 0.081      |
|                                           | CORTnest            | -0.546  | 0.354 | 1, 115 | 2.380         | 0.123        | (C) 0.235      |
|                                           | Treatment (CORT)    | 0.781   | 0.555 | 2, 115 | 1.977         | 0.372        |                |
|                                           | Treatment (Control) | 0.400   | 0.579 | 2, 115 | 1.977         | 0.372        |                |
|                                           | Site (Nature Area)  | 0.865   | 0.514 | 1, 115 | 2.834         | 0.092        |                |
|                                           | Age                 | 0.275   | 0.595 | 1, 115 | 0.214         | 0.643        |                |
|                                           |                     |         |       |        |               |              |                |
| Fledging success A                        | Intercept           | 0.023   | 1.548 | 1, 223 | 0.002         | 0.988        | (M) 0.311      |
|                                           | CORTinc             | 0.605   | 0.534 | 1, 223 | 1.285         | 0.257        | (C) 0.692      |
|                                           | Treatment (CORT)    | 0.970   | 0.991 | 2, 223 | 3.995         | 0.136        |                |
|                                           | Treatment (Control) | -1.245  | 1.032 | 2, 223 | 3.995         | 0.136        |                |
|                                           | Site (Nature Area)  | -1.924  | 0.947 | 1, 223 | 4.132         | <b>0.042</b> |                |
|                                           | Age                 | 1.765   | 1.104 | 1, 223 | 2.558         | 0.120        |                |
|                                           | Year                | -1.570  | 0.960 | 1, 223 | 2.678         | 0.102        |                |
| Fledging success B                        | Intercept           | 1.445   | 3.083 | 1, 151 | 0.220         | 0.639        | (M) 0.136      |
|                                           | CORTnest            | -0.517  | 0.961 | 1, 151 | 0.290         | 0.590        | (C) 0.692      |
|                                           | Treatment (CORT)    | 1.668   | 1.513 | 2, 151 | 2.222         | 0.329        |                |
|                                           | Treatment (Control) | -0.579  | 1.450 | 2, 151 | 2.222         | 0.329        |                |
|                                           | Site (Nature Area)  | -1.650  | 1.511 | 1, 151 | 1.193         | 0.275        |                |
|                                           | Age                 | 2.352   | 1.707 | 1, 151 | 1.897         | 0.168        |                |
|                                           |                     |         |       |        |               |              |                |

Each model includes Nest ID as a random effect; marginal (M) and conditional (C) R<sup>2</sup> values are provided.

There were two analyses of Fledging success (A and B), with predictors including either CORTinc or CORTnest, respectively.

Year was not included in analyses of Nestling mass at day 14 or Fledging success B, because CORTnest was measured in a single year only. Statistically significant main effects are in bold.

**Table 5. Factors predicting the return rate in female tree swallows in the following year.**

| Response variable | Fixed effects        | $\beta$ | SE    | df    | $\chi^2$ | P            | R <sup>2</sup> |
|-------------------|----------------------|---------|-------|-------|----------|--------------|----------------|
| Return rate A     | CORTinc              | 0.334   | 0.483 | 1, 43 | 0.477    | 0.490        | 0.239          |
|                   | Treatment (CORT)     | -0.238  | 0.832 | 2, 43 | 0.615    | 0.735        |                |
|                   | Treatment (Control)  | -0.693  | 0.900 | 2, 43 | 0.615    | 0.735        |                |
|                   | Number of fledglings | 0.543   | 0.243 | 1, 43 | 5.906    | <b>0.015</b> |                |
|                   | Year                 | 0.816   | 0.788 | 1, 43 | 1.123    | 0.289        |                |
|                   | Age                  | -1.211  | 0.921 | 1, 43 | 1.772    | 0.183        |                |
|                   | Site (Nature Area)   | 0.438   | 0.829 | 1, 43 | 0.283    | 0.595        |                |
| Return rate B     | CORTnest             | 0.703   | 1.019 | 1, 21 | 0.503    | 0.478        | 0.445          |
|                   | Treatment (CORT)     | -0.686  | 1.255 | 2, 21 | 0.308    | 0.857        |                |
|                   | Treatment (Control)  | -0.249  | 1.292 | 2, 21 | 0.308    | 0.587        |                |
|                   | Number of fledglings | 0.970   | 0.429 | 1, 21 | 7.379    | <b>0.007</b> |                |
|                   | Age                  | -0.653  | 1.366 | 1, 21 | 0.232    | 0.631        |                |
|                   | Site (Nature Area)   | 2.191   | 1.607 | 1, 21 | 2.051    | 0.152        |                |

There were two analyses of Return rate (A and B), with predictors including either CORTinc or CORTnest, respectively. Year was not included in analyses of Return rate B, because CORTnest was measure in one year only. Statistically significant main effects are in bold.

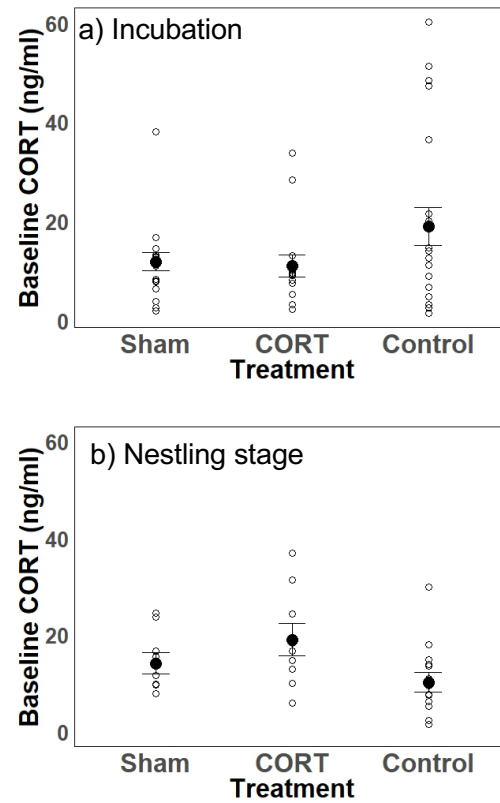

**Figure 1.** There was no significant difference among treatments in plasma corticosterone levels of female tree swallows when measured during (A) incubation and (B) nestling stage. Individuals in the CORT treatment had a single silastic implant containing crystalline corticosterone, those in the Sham treatment had an empty implant, while Control birds had no implant. The black circle indicates the mean  $\pm$  s.e.m. Individual data points are shown.
