1 **Maternal glucocorticoid levels during incubation predict breeding success, but not**  
2 **reproductive investment, in a free-ranging bird.**

3

4

5 Devin Fischer<sup>1</sup>, Robby R. Marrotte<sup>1</sup>, Eunice H. Chin<sup>2,4</sup>, Smolly Coulson<sup>3</sup> and Gary Burness<sup>3\*</sup>

6

7 <sup>1</sup>Environmental and Life Sciences Graduate Program, Trent University, Peterborough, Ontario,

8 Canada

9 <sup>2</sup>Department of Biological Sciences, Simon Fraser University, Burnaby, British Columbia,

10 Canada

11 <sup>3</sup>Department of Biology, Trent University, Peterborough, Ontario, Canada

12 <sup>4</sup>Present address: Biology Department, Capilano University, North Vancouver, BC, Canada

13

14 \* Corresponding Author: garyburness@trentu.ca

15

16 **RUNNING TITLE:** Glucocorticoids and fitness

17 **KEYWORDS:** stressor, corticosterone, fitness, avian, tree swallow

18 **SUMMARY STATEMENT:** Maternal corticosterone levels predict breeding success of female  
19 tree swallows.

20

21  
22  
23  
24  
25  
26  
27  
28  
29  
30  
31  
32  
33  
34  
35  
36  
37  
38  
39

**ABSTRACT**

The hormone corticosterone (CORT)) has been hypothesized to be linked with fitness, but the directionality of the relationship is unclear. The “CORT-fitness hypothesis” proposes that high levels of CORT arise from challenging environmental conditions, resulting in lower reproductive success (a negative relationship). In contrast, the “CORT-adaptation hypothesis” suggests that, during energetically demanding periods, CORT will mediate physiological or behavioural changes that result in increased reproductive investment and success (a positive relationship). During two breeding seasons, we experimentally manipulated circulating CORT levels in female tree swallows (*Tachycineta bicolor*) prior to egg laying, and measured subsequent reproductive effort, breeding success, and maternal survival. When females were recaptured during egg incubation and again during the nestling stage, the CORT levels were similar among individuals in each treatment group, and maternal treatment had no effect on indices of fitness. By considering variation among females, we found support for the “CORT-adaptation hypothesis”; there was a significant positive relationship between CORT levels during incubation and hatching and fledging success. During the nestling stage CORT levels were unrelated to any measure of investment or success. Within the environmental context of our study, relationships between maternal glucocorticoid levels and indices fitness vary across reproductive stages.

40

## 41 **INTRODUCTION**

42 Within and among species individuals vary in the strategies used to maximise fitness, by  
43 adjusting the relative effort put into current versus future reproductive events (Williams, 2005;  
44 Hansen et al., 2016). There is ample evidence that increased energy expenditure and effort  
45 during one breeding bout results in decreased reproductive success, probability of re-nesting, or  
46 survival in subsequent bouts (Nager, 2006; Crossin et al., 2013, 2016; Harms et al., 2014; Bleu,  
47 Gamelon & Sæther, 2016; Henderson et al., 2017).

48       Glucocorticoids (GCs) have been hypothesized to be a mediator of the trade-off between  
49 current and future reproduction (Wingfield et al., 1998; Bleu, Gamelon & Sæther, 2016; Hansen  
50 et al., 2016). GCs are metabolic hormones that fluctuate daily with feeding and other activities,  
51 and under resting conditions regulate energy balance (Landys, Ramenofsky & Wingfield, 2006;  
52 Wilcoxon et al., 2011; Hau & Goymann, 2015). In response to an environmental stressor, GC  
53 levels increase rapidly, resulting in increased availability of metabolic substrates, and adjustment  
54 of behaviors toward immediate survival (Wingfield & Sapolsky, 2003; Romero, 2004) while  
55 inhibiting reproductive behaviour and physiology (Sapolsky et al., 2000; Dantzer et al., 2014),  
56 i.e. the CORT-trade-off hypothesis (Patterson et al., 2014).

57       GCs are thought to play a role in translating environmental cues into adaptive  
58 physiological responses. In birds, the dominant GC is corticosterone (hereafter, CORT), and an  
59 elevation of baseline CORT levels may signal a poor quality environment or an individual in  
60 poor condition (Bonier et al., 2009b). Following this reasoning, Bonier et al (2009a) formulated  
61 “the CORT-fitness hypothesis,” which predicts that individuals with higher circulating CORT  
62 levels would have lower fitness. In support of this, higher baseline CORT levels have been  
63 negatively associated with habitat quality, body condition, hatching success, and fledging

64 success across various species, e.g. blue tits *Cyanistes caeruleus* (Henderson et al., 2017); tree  
65 swallows *Tachycineta bicolor* (Patterson et al., 2011); barn swallows *Hirundo rustica* (Saino et  
66 al., 2005); Adelie penguins *Pygoscelis adeliae* (Thierry et al., 2013).

67 In contrast, a positive relationship is predicted by “the CORT-adaptation hypothesis.”  
68 This hypothesis suggests that because CORT can mediate the mobilization of fuels, causing  
69 changes in behaviour or physiology that can increase investment in reproduction, elevated CORT  
70 will lead to higher fitness during energetically demanding times (Wingfield and Sapolsky, 2003;  
71 Bonier et al., 2009a). Indeed, across a variety of species and life history strategies individuals  
72 with higher reproductive success have been reported to have higher CORT levels, e.g. eastern  
73 bluebirds *Sialia sialis* (Burtka et al., 2016); black-legged kittiwakes *Rissa tridactyla* (Chastel et  
74 al., 2005); petrels *Macronectes* spp (Crossin et al., 2013); western bluebirds *S. mexicana* (Kleist  
75 et al., 2018); mourning doves *Zenaida macroura* (Miller et al., 2009).

76 In fact, there may exist no consistent relationship between CORT and fitness, due to a  
77 variety of factors masking directionality (Madliger and Love, 2016a). For example, a lack of  
78 relationship could be due to different functions of CORT; when resources are plentiful, elevated  
79 CORT could stimulate energy mobilization and parental provisioning; however, CORT could  
80 also be elevated in parents experiencing stressors (Vitousek et al., 2014). Even within a breeding  
81 season, different stages can have differing parental energetic requirements presumably requiring  
82 different levels of GC-mediated energy mobilization (Humphreys et al., 2006; Nager, 2006; Tulp  
83 et al., 2009; Sakaluk et al., 2018).

84 Most studies that have explored relations between CORT and fitness have been  
85 correlative. Although such studies are certainly informative, e.g. (Bonier et al., 2009b), studies  
86 that manipulate CORT levels directly, and explore the resultant parental response are also

87 needed. Using tree swallows as a model organism, we attempted to elevate maternal CORT  
88 experimentally prior to egg-laying, and quantify subsequent variation in maternal reproductive  
89 investment and reproductive success over two breeding seasons. Females were captured shortly  
90 before egg laying and each received a silastic implant containing either corticosterone (CORT)  
91 or left empty (Sham). An additional group of females we captured for the first time during early  
92 incubation but received no implant. Although we refer to these latter females as "controls," we  
93 recognize they may represent a non-random sample and we interpret our results accordingly. We  
94 asked two primary questions: (1) How does maternal CORT influence reproductive investment  
95 and success? (2) Does the directionality of the relationship between maternal CORT and  
96 reproductive investment and success change between the incubation and nestling provisioning  
97 stages, given the increased energy expenditure and brood value during chick provisioning? If the  
98 CORT-fitness hypothesis were true, we expected to detect a negative relationship between  
99 maternal CORT and measures of reproductive investment and success. Conversely, if the CORT-  
100 adaptation hypothesis were true, we expected to see a positive relationship between maternal  
101 CORT and reproductive investment and success.

102

## 103 **MATERIALS AND METHODS**

### 104 **Study location and species**

105 All protocols were approved by Trent University Animal Care Committee, with a handling,  
106 banding and collection permit provided by Canadian Wildlife Service, Environment Canada.  
107 Our study took place during spring and summer 2015 and 2016, using tree swallows, a small,  
108 migratory, aerial insectivore, that breeds across central and northern North America (Winkler et  
109 al., 2011). They are cavity nesters that readily occupy artificial nest boxes, and both sexes begin  
110 nest building in late April to early May, with laying occurring through May and June. Most

111 populations lay only one clutch of 5 or 6 eggs per season; the female then incubates the eggs for  
112 about 14 days. Chicks are fed by both parents and fledge at approximately 21 days post-hatch.

113 We had two field sites near Peterborough Ontario, Canada (University Nature Area: 44°  
114 21' N, 78° 17' W; and Lakefield Township Sewage Lagoon: 44° 25' N, 78° 15' W). In 2015  
115 and 2016, the Nature Area had 66 and 70 boxes, respectively; Sewage Lagoon had 50 and 52  
116 nest boxes. The Nature Area consisted of open woodland with long grasses, shrubs, and scattered  
117 apple (*Malus pumila*), buckthorn (*Rhamnus cathartica*), red cedar (*Juniperus virginiana*), white  
118 cedar (*Thuja occidentalis*), and dogwood (*Cornus florida*). The immediate landscape around  
119 boxes at the Sewage Lagoon was exposed soil and grasses; the greater surrounding area was  
120 farmland consisting of both crop and pasture land. Nest boxes at the Sewage Lagoon were 5 to  
121 10 metres from the water.

122

### 123 **Experimental manipulation of maternal corticosterone levels**

124 Nest boxes were monitored daily beginning 6 May in both years. When nests were about 75%  
125 formed (when cup-shaped or when feathers were present), we captured females using cardboard  
126 trapdoors over the nest box opening, or by surprising birds sitting in nest boxes. In 2015, seven  
127 females were caught at night (between 2200 and 2400 hours) by surprising birds sitting in nest  
128 boxes (no females were found in nest boxes at night in 2016). Upon capture, females were  
129 randomly assigned to CORT or sham treatment groups (Table 1). We sterilized the skin of the  
130 right flank with 70% ethanol, made a 4mm subcutaneous incision, and inserted a sterilized 10mm  
131 silastic tube (ID 1.47mm and OD 1.96mm, Dow Corning 508-006) filled with crystalline CORT  
132 (Sigma Aldrich C2505) that was sealed with silicone sealant (732 Dow Corning) at both ends  
133 (CORT treatment). To each implant we added a single hole using a 30 G needle (Ouyang et al.,

134 2013). The design of our implants followed that of Ouyang et al. (2013), who used a 7 mm long  
135 implant (ID 1.5 mm), sealed at both ends, and punctured with a single 0.3 mm hole. In great tits  
136 (*Parus major*) this design increased corticosterone levels by ~2-fold above baseline for  
137 approximately 30 days post-implantation (Table 1 in Ouyang et al. 2013). Sham treatment tree  
138 swallows received sterilized empty implants. Empty implants weighed approximately 0.02g and  
139 held an average of  $0.007\text{g} \pm 0.0007\text{g}$  of CORT. Once the implant was inserted, the incision in the  
140 skin was sealed with a drop of 3M Vetbond (no. 1469SB). Each female was then aged as second  
141 year, SY, or after-second year, ASY (Pyle et al., 1987). Flattened wing length was measured  
142 with a standard ruler with a wing stop ( $\pm 1\text{mm}$ ), mass was measured with a Pesola spring scale  
143 ( $\pm 0.25\text{g}$ ). All birds (including any males caught inadvertently) were banded with a federal  
144 aluminum numbered leg band (Canadian Wildlife Service) and released. Birds were held for no  
145 more than 10 minutes before release. In 2016 and 2017, any previously banded female from  
146 2015 or 2016 was counted as a returned bird in the return rate analysis regardless of whether they  
147 hatched a clutch that year.

148 We allocated females to the Control group if they were not caught prior to laying, either  
149 because they did not enter the nest box while it had a trap, or because they began laying earlier  
150 than we expected. Although these females did not receive an implant before egg laying they were  
151 handled and measured beginning during incubation (sample sizes in Table 1).

152

### 153 **Nest and egg monitoring**

154 Nest boxes were monitored daily throughout the nest-building and laying period, and when eggs  
155 were discovered, eggs were numbered with a black marker and weighed ( $\pm 0.01\text{ g}$ ) using a digital  
156 balance. One female had a lay date of 15 June, which was greater than 3 standard deviations

157 from the population mean (21 May). We did not consider this female further because we  
158 suspected it was re-nesting after a failed first attempt. All other nests were included in statistical  
159 analyses.

160

### 161 **Nestling measurements**

162 Beginning on day 12 of incubation (incubation day 0 = first day no new eggs were laid, and eggs  
163 were warm to the touch), nest boxes were checked twice daily. The hatch day of the first nestling  
164 was defined as day 0 for that nest. It was not possible to match nestlings to egg identity. We  
165 marked the talons of nestlings with coloured nail polish to distinguish individuals, until we  
166 banded them on day 10 post-hatch with aluminum numbered leg bands (Canadian Wildlife  
167 Service). Nestlings were weighed at hatch with an egg scale ( $\pm 0.01$ g), and on days 3, 7, 10, 13,  
168 and 14 post-hatch with a Pesola spring scale ( $\pm 0.25$ g). Beginning on day 18 post-hatch, we  
169 checked nest boxes daily by partially opening the door to determine fledging success. To guard  
170 against pre-mature fledging, the nest box opening was blocked for 1 minute after checking, and  
171 when the blocking was removed the box was observed for 5 min from a distance of a few metres;  
172 no instances of premature fledging were observed.

173

### 174 **Blood sampling procedure**

175 We recaptured adult females in nest boxes between day 2 and 5 of incubation (both years) and  
176 between day 3 and 6 post-hatch during chick rearing (in 2016 only) between 0600 and 1200  
177 hours. Upon capture, we collected a 100 $\mu$ l blood sample from the brachial vein using a micro-  
178 capillary tube within three minutes of the female entering the nest box. The mean time taken to  
179 draw blood ( $\pm$ SE) was  $125 \pm 5$ s (N=61) during incubation, and  $115 \pm 6$ s (N=26) during the



180 nestling stage. Blood samples were kept on ice for up to eight hours. Samples were then  
181 centrifuged for four minutes at 19,200 x g (Thermo IEC Micro-MB) before plasma and red blood  
182 cells were frozen separately at -80°C. Prior to release, we recorded female body mass and  
183 marked the tail feathers and right primaries with a spot of white acrylic paint to distinguish  
184 females from males during subsequent behavioural observations (Whittingham et al., 2003;  
185 Bonier et al., 2011). If the female had not been captured previously (i.e., she was to become a  
186 Control female), upon first capture during incubation we recorded her head-bill length and wing  
187 length, and banded her.

188         We collected nestling blood samples (50µl) from the brachial vein on days 7 or 8, and 13  
189 post-hatch. Samples taken on day 7 or 8 post-hatch were for molecular sexing and were added to  
190 1ml of lysis buffer in the field and subsequently stored at -20°C. Samples collected on day 13  
191 were centrifuged and plasma was stored at -80°C (as part of a separate study).

192

### 193 **Adult behavioural observation**

194 On day 7 or 8 post-hatch between 0830 and 1400 hours, nest boxes were observed from a  
195 distance of 10 m for 1 hr (Lendvai et al., 2015), during which we counted the number of visits  
196 made by males and females to the nest box. This was the maximum distance at which it was still  
197 possible to distinguish the sex of the adult entering the box through binoculars. Observations  
198 made mid-day have been shown to provide the best estimates of feeding rate, although 1-hour  
199 observations periods done at any time of day predict total daily feeding rates (Lendvai et al.,  
200 2015)

201

### 202 **Lab procedures**

203 *Corticosterone radioimmunoassay*

204 Plasma samples were analyzed for total corticosterone in duplicate using a <sup>125I</sup>  
205 radioimmunoassay (MP Biomedicals #07120103) following the manufacturer's instructions  
206 (Washburn et al., 2002). This assay has low cross-reactivity with deoxycorticosterone (0.34 %),  
207 testosterone (0.10 %), cortisol (0.05 %), aldosterone (0.03 %), and progesterone (0.02%). Plasma  
208 was diluted 1:25 (10µl of plasma plus 240µl of assay buffer). Samples that were not detectable  
209 were set to the lowest point on the standard curve (3.125 ng/ml), following Hogle and Burness  
210 (2014). We did not extract plasma because a serial dilution of non-extracted plasma pooled from  
211 five individuals was parallel to the standard curve. A total of 23 individual assays was  
212 performed. To calculate the inter-assay coefficient of variation (CV) we ran duplicates of the kit  
213 "low" and "high" controls in each assay. The inter-assay CV was 8.6% and 7.4% for the low and  
214 high controls, respectively. To calculate the intra-assay CV, in a single assay we included 4-  
215 replicates of the low and high controls. The intra-assay CVs were 13.4% and 7.9%  
216 (respectively).

217

218 *Molecular sexing protocol*

219 Maternal CORT may facilitate sex-biased investment in nestlings (Love et al., 2005; Love and  
220 Williams, 2008). To evaluate this possibility, nestling blood samples taken on day 7 or 8 post-  
221 hatch were used for genetic sexing using the CHD1W and CHD1Z genes (Fridolfsson and  
222 Ellegren, 1999; Hogle and Burness, 2014). DNA extraction was done using DNEasy blood and  
223 tissue kits (Qiagen 69506). A touchdown PCR procedure was used with 10ul volumes consisting  
224 of 1.2ul 10X buffer, 0.4ul MgCl<sub>2</sub>, 1.0ul dNTP, 0.25ul BSA, 0.2µl each of primers 2550 and 2718  
225 (Fridolfsson and Ellegren, 1999), 1.0µl Taq polymerase, 3.75µl H<sub>2</sub>O, and 2µl DNA in an

226 Eppendorf thermocycler. Initial denaturing began at 94°C for 5 min followed by a touchdown  
227 sequence where the annealing temperature was lowered 1°C per cycle from 94° to 50°C. A  
228 further 24 cycles were run with a denaturing temperature of 94°C for 30 s, annealing temperature  
229 of 40°C for 30 s and extension of 72°C for 30 s, followed by a final extension at 72°C for 2 min  
230 after the last cycle. PCR products were separated in a 3% agarose gel stained with ethidium  
231 bromide and run in 1X TBE buffer. Each gel was run with known male and female adult samples  
232 for comparison (N=273 chicks).

233

### 234 **Statistical analyses**

235 All data will be deposited in the DataDryad data repository. We used R version 3.4.3 (2017) to  
236 run all analyses, and statistical significance was claimed at  $P < 0.05$ . During field work we were  
237 generally blind to the experimental treatment, but not during statistical analysis. Sample sizes  
238 were determined by the number of breeding individuals in our study population that could be  
239 captured. To improve normality, all CORT values were  $\log_e$  transformed; all other metrics were  
240 untransformed. Raw means are reported  $\pm$  SE. Sample sizes varied among analyses because we  
241 were not always able to collect all measurements from all individuals. We included ‘year’ as a  
242 factor only in analyses of maternal CORT during incubation (CORTinc), because during the  
243 nesting phase (CORTnest) we measured CORT in one year only (2016). To avoid possible carry-  
244 over effects of experimental treatment, females re-captured during the second year of the study  
245 were included for their first year of capture only.

246 We constructed our statistical models including only main effects that were of likely  
247 biological importance and/or *a priori* interest; as such, not all two-way interactions were  
248 included. We report outputs from global statistical models. Because we had explicit hypotheses,

249 and because none of our response variables was correlated, we did not to use a post-hoc  
250 correction for the number of tests performed (Perneger, 1998; Streiner, 2015).

251

252 *Morphological and hormonal measures of adult females*

253 We ran preliminary tests to determine whether females that had been assigned to CORT or Sham  
254 treatment groups differed in pre-implant body mass (measured at time of implant; females in the  
255 Control group were not captured prior to incubation and thus there was no pre-implant mass  
256 measurement). To test for possible differences in body size among treatments, we compared a  
257 female's wing length (measured pre-laying in the CORT and Sham treatments, and during early  
258 incubation in the Control females). Finally, we tested for differences in clutch initiation date in  
259 Julian days among treatments. Separate linear models (LM) were run with female pre-laying  
260 mass, wing length, and clutch initiation date as the response variable, and treatment (CORT,  
261 Sham, Control), site (Nature areas, Sewage Lagoon), year (2015, 2016), and age (Second year,  
262 SY; After second year, ASY) as the predictors. We did not include any interactions terms as they  
263 were not of *a priori* interest.

264 To test whether implanted females differed in their probability of recapture depending on  
265 treatment or year, we ran a generalized linear model (GLM) with binomial errors, with recapture  
266 status (recaptured/non-recaptured) as the dependent variable, and treatment and year as the fixed  
267 effects. To test whether the total number of individuals that retained their implants and  
268 subsequently laid eggs differed between the CORT and Sham maternal treatment groups, we  
269 used a chi-square test (because Control females were only captured post-egg laying, they were  
270 not included in this analysis).

271

272 *Maternal baseline corticosterone during incubation and nestling stages*

273 To test whether treatment affected maternal CORT levels within each breeding stage (incubation  
274 and nestling), we used linear models (LM) with either CORT during incubation (from hereafter  
275 CORTinc) or CORT during the nestling stage (CORTnest) as the response variable and maternal  
276 treatment, age, site, sample time (time from initial contact with bird to end of blood sample), and  
277 clutch initiation date (in Julian days) as fixed effects. We had no *a priori* predictions regarding  
278 interactions, so none was included in the models.

279 We analyzed CORTinc and CORTnest separately because CORTnest was only measured  
280 in 2016. Baseline CORTinc measurements (N=59) had one suspected outlier (121.22 ng/ml)  
281 removed prior to analysis. This value was > 3 standard deviations from the mean; considerably  
282 higher than the 0.5 to 14 ng/ml range reported for previously (Franceschini et al., 2008; Ouyang  
283 et al., 2011; Patterson et al., 2011; Madliger et al., 2015). Preliminary analyses were run with and  
284 without this outlier, and although no difference was found in the pattern of significance of  
285 parameters, we chose to exclude it.

286

287 *Measures of female reproductive investment*

288 As indices of maternal investment during incubation we used clutch mass (summed mass of  
289 individual eggs at laying), and during the nestling phase we used maternal nest box visitation rate  
290 and nestling growth rate. To test whether a female's clutch mass correlated with her CORT  
291 levels, we used a linear model (LM) with clutch mass as the response variable and CORTinc,  
292 maternal treatment, age, site, and year as main effects. To explore investment during the nestling  
293 stage, we used a LM with the number of nest box visits per chick per hour (by the female) as the  
294 response variable and CORTnest, treatment, maternal age, site, and male nest box visits per

295 chick per hour as fixed effects. Finally, we calculated nestling growth rate per day during the  
296 linear growth phase (Burness et al., 2001) as the difference in individual mass between days 3  
297 and 7 post-hatch, divided by 4 days. We used a linear mixed model (LMM, lmer in R package  
298 lme4) with individual chick mass gain per day as the response variable, and nest ID as a random  
299 effect. Fixed effects were CORTnest, maternal treatment, maternal age, site, nestling sex. To  
300 evaluate the possibility that maternal corticosterone may be linked with sex-specific investment  
301 in offspring (e.g., Love et al., 2005), we included an interaction between nestling sex and  
302 CORTnest.

303

#### 304 *Measures of female reproductive success*

305 To test for a relationship between CORTinc and indices of reproductive success, we used a  
306 generalized linear mixed model (GLMM; glmer in R package lme4) with binomial errors, with  
307 either hatching or fledging success as the response variable (0 or 1 for each chick) and CORTinc,  
308 maternal treatment, age, site, and year as fixed effects, and nest ID as a random effect. To  
309 explore the relationship between CORTnest and post-hatching reproductive success, we  
310 examined individual nestling mass at day 14 post-hatch and fledging success as indices of  
311 reproductive success. To test whether nestling mass differed with maternal CORT or treatment,  
312 we used a LMM with nestling mass at day 14 as the response variable and CORTnest, maternal  
313 treatment, maternal age, and site as fixed effects (year was not included because CORTnest was  
314 measured in 2016 only), and Nest ID as a random effect. Finally, to test whether fledging success  
315 differed with maternal CORT or treatment, fledging success (0 or 1 for each chick) was used as  
316 the response variable in a GLMM with binomial errors with maternal treatment, maternal age,

317 site, and CORTnest as fixed effects, and Nest ID as a random effect. No interaction terms were  
318 included in these analyses.

319

### 320 *Measures of female survival*

321 We estimated female survival by using the return rates of adult females to the study sites the  
322 following spring and comparing this with CORTinc or CORTnest during the previous year in  
323 separate models. Return rate (either 0 or 1) was the response variable in a general linear model  
324 (GLM), with CORTinc (or CORTnest), treatment, year, age, site, and number of nestlings  
325 fledged as main effects. In analyses of CORTnest, “year” was not included in the model because  
326 CORTnest was only measured in a single year (2016).

327

## 328 **RESULTS**

### 329 **Morphology and hormonal measures of adult females**

330 We implanted 45 females with corticosterone-filled implants (CORT), and 44 with sham  
331 implants (Sham); an additional 23 females were captured for the first time during incubation and  
332 were allocated to the Control treatment (Table 1). There was no difference in pre-egg laying  
333 body mass between females allocated to the CORT and Sham groups (Table S1); females in the  
334 Control group were not captured prior to egg laying, so there was no pre-egg laying mass.  
335 Focusing on individuals that retained their implants, wing length and clutch initiation date did  
336 not differ significantly among treatments (Table S1). There was no significant difference  
337 between the Sham and CORT treatments in the percentage of females that retained their implants  
338 and subsequently laid eggs (Sham: 45% (20 of 43), CORT: 31% (14 of 44);  $\chi^2=0.865$ ,  $df=1$ ,  $p =$   
339  $0.352$ ; Table 1; a single CORT and Sham female of unknown age were omitted from the  
340 analysis).

341           There was no significant difference by year in the number of implanted females that were  
342 recaptured during incubation ( $\beta = 0.800$ ,  $SE = 0.509$ ,  $z = 1.573$ ,  $p = 0.116$ ,  $N_{2015}=34$  recaptured  
343 and 25 non-recaptured,  $N_{2016}=22$  recaptured and 8 non-recaptured. However, sham-implanted  
344 individuals were more likely to be recaptured than CORT-implanted ( $\beta = 1.115$ ,  $SE = 0.468$ ,  $z =$   
345  $2.381$ ,  $p = 0.017$ ,  $N_{Sham}=33$  recaptured and 11 non-recaptured,  $N_{CORT}=23$  recaptured and 22 non-  
346 recaptured). Control birds were not included in the recaptured/not recaptured analysis because  
347 they were caught for the first time during incubation.

348

#### 349 **Implants failed to raise long-term maternal corticosterone levels**

350 During incubation, females were recaptured on average 17.02 days ( $\pm 0.63$ ) after implantation  
351 (range 7 to 26 days). Contrary to expectations, when females were recaptured there was no  
352 difference in CORT levels among the 3 treatments (Table 2; Fig. 1A). Lay date (i.e., clutch  
353 initiation date) was also not a significant predictor of CORTinc (Table 2). However, older  
354 mothers (ASY) had higher CORTinc levels than SY mothers and levels differed between years  
355 (Table 2). During nestling provisioning, maternal baseline CORT (CORTnest) did not differ  
356 among treatments (Table 2, Fig. 1B), nor with any other fixed effects (Table 2).

357

#### 358 **Maternal corticosterone levels did not predict reproductive investment**

359 Mean clutch size ( $\pm SE$ ) of females was 5.3 eggs  $\pm$  0.1 (range = 3 to 7 eggs per nest,  $N=67$  nests).  
360 Reproductive investment during laying, measured as clutch mass, did not correlate with maternal  
361 CORT levels during incubation (CORTinc) nor with maternal treatment, although older birds  
362 had significantly heavier clutches (Table 3). Similarly, during the nestling stage, there was no  
363 relationship between either maternal CORT (CORTnest) or treatment on the number of female



364 nest box visits (Table 3). Although maternal treatment did not influence nestling growth rate  
365 between days 3 and 7, there was a marginally significant negative relationship between maternal  
366 CORT<sub>nest</sub> and nestling growth rate ( $p = 0.092$ , Table 3). Maternal age influenced nestling  
367 growth rates, with nestlings from SY mothers having higher growth rates than nestlings from  
368 ASY mothers (Table 3).

369

### 370 **Maternal corticosterone levels during incubation predicted reproductive success**

371 As indices of reproductive success, we measured hatching success, nestling mass at day 14 post-  
372 hatch, and fledging success. Mothers with higher CORT during incubation (CORT<sub>inc</sub>) had  
373 significantly higher hatching success (Table 4). Nestling mass at day 14 post-hatch was not  
374 predicted by either CORT<sub>nest</sub> nor maternal treatment, although nestlings at the Nature Area site  
375 tended to be heavier (Site:  $p = 0.064$ ; Table 4).

376         The probability of a nestling fledging significantly increased with maternal corticosterone  
377 levels measured during incubation (Fledging success A, Table 4). There was a marginally  
378 significant negative relationship during the nestling phase (Fledging success B,  $p = 0.060$ ), but  
379 this was driven, at least in part, by a control female with the lowest hormone levels (2.34 ng/ml)  
380 yet 100% fledging success. Maternal treatment had no effect on fledging success (Fledging  
381 success A or B, Table 4). Fledging success tended to be higher at the Sewage Lagoon site  
382 (Fledging success (A), Site:  $p=0.062$ ; Table 4).

383

### 384 **Maternal return rate was not significantly predicted by maternal corticosterone levels**

385 Twenty-nine of 67 (43%) females (Sham, CORT or Control) returned in the year after they were  
386 initially caught, and all returning females returned to the same breeding site where initially

387 caught. The number of females included in the analysis differs from totals in Table 1, because  
388 only females with corticosterone measurements were included. The probability that a female  
389 returned tended to increase with her incubation CORT levels (CORT<sub>inc</sub>,  $p = 0.054$ ) and number  
390 of fledglings in the previous year (Return rate (A):  $p=0.056$ , Table 5). There was no significant  
391 effect of CORT<sub>nest</sub> or maternal treatment on the likelihood of a female returning to the nest sites  
392 the following year (Table 5).

393

## 394 **DISCUSSION**

395 Our data support the CORT-adaptation hypothesis. During egg incubation, corticosterone levels  
396 of female tree swallows were positively related to two measures of reproductive success  
397 (hatching and fledging success) and positively (albeit non-significantly) with female return rates.  
398 During the nestling stage, there was no relationship between corticosterone and indices of either  
399 reproductive investment or reproductive success. During neither period did we detect a  
400 significant negative relationship between CORT and fitness, as predicted by the CORT-fitness  
401 hypothesis.

402

### 403 **Maternal corticosterone levels during incubation**

404 We tested for a relationship between maternal corticosterone levels during incubation  
405 (CORT<sub>inc</sub>) and clutch mass (as a single measure of reproductive investment), and hatching  
406 success and survival to fledging as measures of reproductive success (Bonier et al., 2009b;  
407 Schoenle et al., 2017). We found no relation between CORT<sub>inc</sub> and clutch mass, however,  
408 female tree swallows with higher CORT<sub>inc</sub> levels had greater hatching success and higher  
409 fledging success. The positive relationship we detected with hatching success may be due to  
410 CORT mobilizing energy stores, and thus allowing for increased reproductive effort (Riechert et

411 al., 2014). However, positive (common terns *Sterna hirundo*) (Riechert et al., 2014), negative  
412 (zebra finches) (Khan et al., 2016), and null relationships (red-winged blackbirds) (Schoenle et  
413 al., 2017) have all been reported between maternal CORT and hatching success. Differences in  
414 the directionality of the relationships are presumably due to various environmental factors,  
415 including weather conditions (Schoenle et al., 2017), food (Riechert et al., 2014), and/or resource  
416 availability (Breuner and Burk, 2019).

417         A positive relationship between CORTinc and fledging success is consistent with  
418 relationships reported in eastern bluebirds (Burtka et al., 2016) and blue tits (Henderson et al.,  
419 2017). However in tree swallows, both negative (Bonier et al., 2009b) and statistically non-  
420 significant (Madliger and Love, 2016a) relationships between CORTinc and number of  
421 fledglings have been reported. A positive relationship, such as we detected, between maternal  
422 CORT during incubation and fledging success might be expected if the relationship were  
423 mediated through maternal transfer of CORT into the egg, leading to higher begging rates and  
424 body size in nestlings of mothers with higher CORT (Bowers et al., 2016). However, this would  
425 be a plausible mechanism only if CORT levels during incubation correlated with levels pre-  
426 laying, as has been found in other tree swallow populations (Ouyang et al., 2011); something we  
427 did not evaluate in our study.

428         A positive relationship between maternal CORT and fitness (CORT-adaptation  
429 hypothesis) should emerge when CORT levels are increased to meet higher energetic demands  
430 associated with reproduction (Bonier et al., 2009a; Crossin et al., 2013; Rivers et al., 2017).  
431 During incubation, individuals may experience more unpredictable stressors than during the  
432 nestling stage (Romero, 2002). For example, challenging environmental conditions such as lower  
433 temperatures and scarcer food resources in early spring can cause a negative relationship

434 between both temperature and foraging success and baseline CORT levels, depending on the  
435 fitness and environmental measure used (Angelier et al., 2007; Wingfield et al., 2010; Ouyang et  
436 al., 2015). Because higher baseline levels may prime the body to perform better under stress,  
437 females with higher baseline CORT during incubation in our study may have been better able to  
438 meet these challenges (Romero, 2002).

439

#### 440 **Maternal corticosterone levels during chick rearing**

441 We predicted that if there were a relationship between CORT and reproductive investment and  
442 success, it would most likely emerge post-hatch, given the higher maternal energy expenditure  
443 required during chick rearing than during incubation (Nilsson and Råberg, 2001; Humphreys et  
444 al., 2006; Sakaluk et al., 2018) but see (Williams, 2018) . However, female CORT levels during  
445 chick rearing were unrelated to any measure of reproductive investment (nest box visits and  
446 nestling growth rate) nor any measure of reproductive success (nestling mass at day 14 and  
447 fledging success). Despite our inability to detect relationships, others have reported that  
448 individuals with higher baseline CORT levels during chick rearing had higher parental foraging  
449 effort, provisioning rates, and energy transfer to the nestlings, e.g. macaroni penguins *Eudyptes*  
450 *chrysolophus* (Crossin et al., 2012); tree swallows (Bonier et al., 2011); mourning doves (Miller  
451 et al., 2009). Across studies, differences in the relationship between CORT and reproductive  
452 success may be due to various fitness measures used, the relative importance of paternal  
453 investment, or environmental variation.

454 While female tree swallows are solely responsible for egg incubation, nestling  
455 provisioning is shared with the male (Winkler et al., 2011). As a result, variation in paternal  
456 quality may obscure relationships between maternal CORT and investment during the nestling

457 stage. A lack of relationship between CORTnest and female nest box visits has been found in  
458 bluebirds (Davis and Guinan, 2014) and other populations of tree swallows (Patterson et al.,  
459 2011), suggesting variation among females in their glucocorticoid levels may not directly reflect  
460 maternal behaviour. In contrast, Madliger and Love (2016b) found that higher baseline  
461 CORTnest in female tree swallows correlated with lower rates of maternal provisioning;  
462 however, males compensated for the females' low rates by increasing their own provisioning  
463 rates such that nestlings were not affected. Similarly, Patterson et al. (2011) suggested male tree  
464 swallows could compensate for decreased provisioning of their mates, although no male  
465 compensation for reduced maternal performance has also been found (Hogle and Burness, 2014).  
466 Given the importance of male provisioning to nestling mass gain (Lendvai and Chastel, 2010;  
467 Madliger and Love, 2016b; Nomi, 2018), male nest box visits and paternal quality need to be  
468 considered when predicting a pairs' reproductive investment in a nest. Future studies should  
469 include male CORT levels, and their relationship with male feeding rates and reproductive  
470 success, as in (Ouyang et al., 2011).

471         The directionality of the relationship between maternal CORT and fitness varies among  
472 life stages, populations and species (e.g., Bonier et al., 2009a). Some of this variation is  
473 presumably due to the context-dependency of the CORT-fitness relationship and variation in  
474 environmental conditions (Burtka et al., 2016; Madliger and Love, 2016b). For example,  
475 experimental elevation of maternal CORT levels increased brood mortality in tree swallows, but  
476 only when weather conditions were benign (Ouyang et al., 2015). Our inability to detect  
477 relationships between maternal hormone levels during chick rearing and reproductive success  
478 could be due to the influence of such factors as food availability or weather, both of which could  
479 affect body condition and reproductive success of the mother (Schoech et al., 2007; Madliger and

480 Love, 2016a). Maternal baseline CORT may also depend on the habitat type in which female tree  
481 swallows were breeding (Madliger and Love, 2016b). While we found no significant difference  
482 in reproductive investment between the two study sites, we did find that CORTinc and fledging  
483 success tended to be higher at one of our sites (Sewage Lagoon). Reproductive success may  
484 perhaps be mediated by a relationship between CORT and foraging conditions (Henderson et al.,  
485 2017), which could change from incubation to the nestling stage.

486

#### 487 **No relationship between corticosterone and return rates**

488 We found a borderline ( $p = 0.054$ ) positive relationship between CORTinc and the probability of  
489 whether a female returned to the breeding sites the following year. One explanation for the lack  
490 of significance is that the relationship between CORT levels and return rates may be non-linear.  
491 For example, in cliff swallows (*Petrochelidon pyrrhonata*), highest return rates were seen in  
492 individuals with intermediate baseline CORT levels, which could be due to stabilizing selection  
493 on CORT levels acting against the detrimental effects of very high or low CORT (Brown et al.,  
494 2005; Bonier et al., 2009a). Additionally, environmental variables (Clark et al., 2018) or an  
495 individual's reproductive success may better predict return rates than baseline CORT: the  
496 positive (albeit non-significant) effect of fledgling number on maternal return rates that we  
497 detected suggests that females with higher reproductive success are more likely to return to a  
498 certain area to breed (Bonier et al., 2009b). Thus, CORT may affect return rates and survival  
499 indirectly, by affecting fledging success (Shitikov et al., 2017; Weegman et al., 2017).

500

#### 501 **Efficacy of silastic implants to raise plasma glucocorticoids**

502 We implanted pre-egg laying females with corticosterone-filled silastic implants, but when  
503 females were recaptured during early-to mid-incubation (mean  $\pm$  SE: 17.0 days  $\pm$  0.6 after  
504 implantation), the baseline CORT levels of implanted birds did not differ from unmanipulated  
505 birds. However, CORT-implanted individuals had a lower probability of recapture during  
506 incubation, consistent with a negative relationship between experimental CORT elevation and  
507 survival (Schoenle et al., 2019 preprint). Across species, silastic implants have been successfully  
508 used to raise CORT levels for anywhere from a few days (Astheimer et al., 2000; Hayward and  
509 Wingfield, 2004; Criscuolo et al., 2005; Martin et al., 2005; Angelier et al., 2007) to three weeks  
510 post-implantation *in vivo* (Ouyang et al., 2013) and *in vitro* (Newman et al., 2010). However, the  
511 use of implants to raise CORT levels has not been consistently successful (Crossin et al., 2012;  
512 Ouyang et al., 2013; Hau and Goymann, 2015; Lattin et al., 2016, Torres-Medina et al., 2018).  
513 Although the implants used in our study may have failed to release CORT, this seems unlikely  
514 given that *in vitro* studies have shown that CORT continues to be released across the membrane  
515 over 4 weeks (Newman et al., 2010). More likely, the implants resulted in decreased secretion of  
516 endogenous CORT via negative feedback, or increased clearance of CORT from the blood via  
517 increased excretory activity (Newman et al., 2010; Henriksen et al., 2011; Robertson et al.,  
518 2015).

519         Rather than experimentally manipulate CORT levels via implants, an alternative  
520 approach may be to manipulate maternal condition, such as with feather clipping (Rivers et al.,  
521 2017), predator experiments (Clinchy et al., 2011; Pitk et al., 2012), or density manipulations  
522 (Bentz et al., 2013). Such an approach would encompass how maternal CORT levels change  
523 based on how each female perceives her condition/ environment, how that is reflected in blood

524 CORT levels, and how those levels might influence the next generation (Madliger and Love,  
525 2016a; Rivers et al., 2017).

526

## 527 **Conclusions**

528 The differing directionality of relationship between CORT and fitness among studies and species  
529 raises the simple question: is there is a consistent relationship to be found among individuals  
530 within a population? Many factors can affect both CORT and fitness, including condition (Love  
531 et al., 2005), life-history stage (Romero, 2002), weather (Pakkala et al., 2016), habitat variability  
532 (Madliger and Love, 2016b), and resource availability (Breuner and Burk 2019). If it can be  
533 reasonably assumed that these will always differ among individuals, then perhaps there is no  
534 consistent relationship, and any that may be detected will always be context-dependent  
535 (Madliger and Love, 2016a). Recent meta-analyses that seek to understand relationships between  
536 CORT and fitness across taxa, and studies that identify factors that contribute to context-  
537 dependence, are particularly valuable (Sorenson et al., 2017; Breuner and Burk 2019; Schoenle  
538 et al., 2019 preprint; Bonier & Cox 2020).

539 The use of integrative measures of CORT may be an alternative way to improve our  
540 understanding of the relationship between CORT and fitness. By measuring CORT deposited in  
541 feathers during growth, or metabolites excreted in feces, it may be possible to infer CORT levels  
542 over multiple days of the incubation or nestling stage (Lucas et al., 2006; Bortolotti et al., 2008;  
543 Romero and Fairhurst, 2016). For example, giant petrels that successfully bred had higher feather  
544 CORT levels than failed breeders, but were less likely to breed the following year, a pattern  
545 which was not observed using plasma CORT from these same individuals (Crossin et al., 2013).  
546 Ideally, studies could be extended over the winter, as has been done recently in adult tree



547 swallows (Vitousek et al., 2018). This would help elucidate the longer-term effects of maternal  
548 CORT on offspring and maternal and fitness.

549

#### 550 **FUNDING**

551 Funding was provided by the Natural Sciences and Engineering Research Council (NSERC)  
552 Canada, the Canadian Foundation for Innovation and the Ontario Innovation Trust.

553

#### 554 **ACKNOWLEDGEMENTS**

555 We thank Noah Ben-Ezra, Chantelle Penney and Aleesa Manax for their many hours of help in  
556 the field. Erica Nol, Joe Nocera, Jeff Bowman and an anonymous referee provide numerous for  
557 suggestions for improving the clarity of an earlier draft of the manuscript.

558

#### 559 **COMPETING INTERESTS**

560 The authors declare no competing or financial interests.

## LITERATURE CITED

- Angelier, F., Clement-chastel, C., Gabrielsen, G. and Chastel, O.** (2007). Corticosterone and time–activity budget: An experiment with black-legged kittiwakes. *Horm. Behav.* **52**, 482–491.
- Astheimer, L. B., Buttemer, W. A. and Wingfield, J. C.** (2000). Corticosterone treatment has no effect on reproductive hormones or aggressive behavior in free-living male tree sparrows, *Spizella arborea*. *Horm. Behav.* **37**, 31–39.
- Bentz, A. B., Navara, K. J. and Siefferman, L.** (2013). Phenotypic plasticity in response to breeding density in tree swallows: An adaptive maternal effect? *Horm. Behav.* **64**, 729–736.
- Bleu, J., Gamelon, M. and Sæther, B.** (2016). Reproductive costs in terrestrial male vertebrates: insights from bird studies. *Proc. R. Soc. B.* **283**, 1–9.
- Bonier, F. and Cox, R. M.** (2020). Do hormone manipulations reduce fitness? A meta-analytic test of the Optimal Endocrine Phenotype Hypothesis. *Mol. Cell. Endocrinol.* **500**, 110640. DOI: 10.1016/j.mce.2019.110640
- Bonier, F., Martin, P. R., Moore, I. T. and Wingfield, J. C.** (2009a). Do baseline glucocorticoids predict fitness? *Trends Ecol. Evol.* **24**, 634–642.
- Bonier, F., Moore, I. T., Martin, P. R. and Robertson, R. J.** (2009b). The relationship between fitness and baseline glucocorticoids in a passerine bird. *Gen. Comp. Endocrinol.* **163**:208–213.
- Bonier, F., Moore, I. T. and Robertson, R. J.** (2011). The stress of parenthood? Increased glucocorticoids in birds with experimentally enlarged broods. *Biol. Lett.* **7**:944–946.
- Bortolotti, G. R., Marchant, T. A., Blas, J. and German, T.** (2008). Corticosterone in feathers is a long-term, integrated measure of avian stress physiology. *Funct. Ecol.* **22**, 494–500.
- Bowers, E. K., Bowden, R. M., Thompson, C. F. and Sakaluk, S. K.** (2016). Elevated

corticosterone during egg production elicits increased maternal investment and promotes nestling growth in a wild songbird. *Horm. Behav.* **83**, 6–13.

**Brown, C. R., Brown, M. B., Raouf, S. A., Smith, L. C. and Wingfield J. C.** (2005). Effects of endogenous steroid hormone levels on annual survival in cliff swallows. *Ecology* **86**:1034–1046.

**Burness, G. P., Ydenberg, R. C. and Hochachka, P. W.** (2001). Physiological and biochemical correlates of brood size and energy expenditure in tree swallows. *J. Exp. Biol.* **1501**:1491–1501.

**Breuner, C. W. and Burk, S. A.** (2019). Using the van Noordwijk and de Jong resource framework to evaluate glucocorticoid-fitness hypotheses. *Integr. Comp. Biol.* **59**, 243-250.

**Burtka, J. L., Lovern, M. B. and Grindstaff, J. L.** (2016). Baseline hormone levels are linked to reproductive success but not parental care behaviors. *Gen. Comp. Endocrinol.* **229**, 92–99.

**Chastel, O., Lacroix, A., Weimerskirch, H. and Gabriëlsen, G. W.** (2005). Modulation of prolactin but not corticosterone responses to stress in relation to parental effort in a long-lived bird. *Horm. Behav.* **47**, 459–466.

**Clark, R. G., Winkler, D. W., Dawson, R. D., Shutler, D., Hussell, D. J. T., Lombardo, M. P., Thorpe, P. A., Dunn, P. O. and Whittingham, L. A.** (2018). Geographic variation and environmental correlates of apparent survival rates in adult tree swallows *Tachycineta bicolor*. *J. Avian Biol* **49**, 1–13. DOI: 10.1111/jav.01659.

**Clinchy, M., Zanette, L., Charlier, T. D., Newman, A. E. M. and Schmidt, K. L.** (2011). Multiple measures elucidate glucocorticoid responses to environmental variation in predation threat. *Oecologia* **166**, 607–614.

**Criscuolo, F., Chastel, O., Bertile, F., Gabrielsen, G. W., Le Maho, Y. and Raclot T. (2005).**

Corticosterone alone does not trigger a short term behavioural shift in incubating female common eiders *Somateria mollissima*, but does modify long term reproductive success. *J. Avian Biol.* **4**, 306–312.

**Crossin, G. T., Love, O. P., Cooke, S. J. and Williams, T. D. (2016).** Glucocorticoid

manipulations in free-living animals: considerations of dose delivery, life-history context and reproductive state. *Funct. Ecol.* **30**, 116–125.

**Crossin, G. T., Phillips, R. A., Lattin, C. R., Romero, L. M. and Williams, T. D. (2013).**

Corticosterone mediated costs of reproduction link current to future breeding. *Gen. Comp. Endocrinol.* **193**, 112–120.

**Crossin, G. T., Trathan, P. N., Phillips, R. A., Gorman, K. B., Dawson, A., Sakamoto, K. Q.**

**and Williams, T. D. (2012).** Corticosterone predicts foraging behavior and parental care in macaroni penguins. *Am Nat* **180**, E31–E41. doi: 10.1086/666001.

**Dantzer, B., Fletcher, Q. E., Boonstra, R. and Sheriff, M. J. (2014).** Measures of

physiological stress: a transparent or opaque window into the status, management and conservation of species? *Conserv. Physiol.* **2**, 1–18. DOI: 10.1093/conphys/cou023.

**Davis, J. E. and Guinan, J. A. (2014).** Parental behavior correlates to baseline corticosterone of

mates and offspring in nesting eastern bluebirds (*Sialia sialis*). *Gen. Comp. Endocrinol.* **201**, 1–7.

**Franceschini, M. D., Custer, C. M., Custer, T. W., Reed, J. M. and Romero, L. M. (2008).**

Corticosterone stress response in tree swallows nesting near polychlorinated biphenyl- and dioxin-contaminated rivers. *Environ. Toxicol. Chem.* **27**, 2326–2331.

**Fridolfsson, A. K. and Ellegren, H. (1999).** A simple and universal method for molecular

sexing of non-ratite birds. *J. Avian Biol.* **30**, 116-121.

**Hansen, W. K., Bate, L. J., Landry, D. W., Chastel, O., Parenteau, C. and Breuner, C. W.**

(2016). Feather and faecal corticosterone concentrations predict future reproductive decisions in harlequin ducks (*Histrionicus histrionicus*). *Conserv. Physiol.* **4**, 1–10. DOI: 10.1093/conphys/cow015.

**Harms, N. J., Legagneux, P., Gilchrist, H. G., Love, O. P., Forbes, M. R., Bortolotti, G. R.**

**and Soos, C.** (2014). Feather corticosterone reveals effect of moulting conditions in the autumn on subsequent reproductive output and survival in an Arctic migratory bird. *Proc. R. Soc. B.* **282**, 20142085.

**Hau, M. and Goymann W.** (2015). Endocrine mechanisms, behavioral phenotypes and plasticity: known relationships and open questions. *Front. Zool.* **12**, S7 DOI:10.1186/1742-9994-12-S1-S7.

**Hayward, L. S. and Wingfield, J. C.** (2004). Maternal corticosterone is transferred to avian yolk and may alter offspring growth and adult phenotype. *Gen. Comp. Endocrinol.* **135**, 365–371.

**Henderson, L. J., Evans, N. P., Heidinger, B. J., Herborn, K. A. and Arnold, K. E.** (2017). Do glucocorticoids predict fitness? Linking environmental conditions, corticosterone and reproductive success in the blue tit, *Cyanistes caeruleus*. *R. Soc. Open Sci.* **4**, 170875. doi.org/10.1098/rsos.170875.

**Henriksen, R., Groothuis, T. G. G. and Rettenbacher, S.** (2011). Elevated plasma corticosterone decreases yolk testosterone and progesterone in chickens: linking maternal stress and hormone-mediated maternal effects. *Plos One* **6**, 2–9. DOI: 10.1371/journal.pone.0023824.

**Hogle, N. C. and Burness, G.** (2014). Sex-specific environmental sensitivity is transient in nestling Tree Swallows (*Tachycineta bicolor*). *J. Ornithol.* **155**, 91–100.

- Humphreys, E. M., Wanless, S. and Bryant, D. M.** (2006). Stage-dependent foraging in breeding black-legged kittiwakes *Rissa tridactyla*: distinguishing behavioural responses to intrinsic and extrinsic factors. *J. Avian Biol.* **37**, 436–446.
- Khan, N., Peters, R. A. and Robert, K.** (2016). Compensating for a stressful start: maternal corticosterone, offspring survival, and size at fledging in the Zebra Finch, *Taeniopygia guttata*. *Emu* **116**, 262–272.
- Kleist, N. J., Guralnick, R. P., Cruz, A., Lowry, C. A. and Francis, C. D.** (2018). Chronic anthropogenic noise disrupts glucocorticoid signaling and has multiple effects on fitness in an avian community. *Proc. Natl. Acad. Sci USA* **115**, E648–E657.
- Landys, M. M., Ramenofsky, M. and Wingfield, J. C.** (2006). Actions of glucocorticoids at a seasonal baseline as compared to stress-related levels in the regulation of periodic life processes. *Gen. Comp. Endocrinol.* **148**, 132–149.
- Lattin, C. R., Breuner, C. W., Romero, L. M.** (2016). Does corticosterone regulate the onset of breeding in free-living birds? The CORT-Flexibility Hypothesis and six potential mechanisms for priming corticosteroid function. *Horm. Behav.* **78**, 107–120.
- Lendvai, Á. Z. and Chastel, O.** (2010). Natural variation in stress response is related to post-stress parental effort in male house sparrows. *Horm. Behav.* **58**:936–942.
- Lendvai, Á. Z., Ouyang, J. Q., Dakin, R., Domalik, A. D., St. John, P. S., Stanback, M., Moore, I. T. and Bonier, F.** (2015). Analysis of the optimal duration of behavioral observations based on an automated continuous monitoring system in tree swallows (*Tachycineta bicolor*): Is one hour good enough? *PLoS ONE* **10**, 1–11. DOI: 10.1371/journal.pone.0141194.
- Love, O. P., Chin, E. H., Wynne-Edwards, K. E. and Williams, T. D.** (2005). Stress

- hormones: a link between maternal condition and sex-biased reproductive investment. *Am. Nat.* **166**, 751–766.
- Love, O. P. and Williams, T. D.** (2008). The adaptive value of stress-induced phenotypes: effects of maternally derived corticosterone on sex-biased investment, cost of reproduction, and maternal fitness. *Am. Nat.* **172**, E135-E149.
- Lucas, J. R., Freeberg, T. M., Egbert, J. and Schwabl, H.** (2006). Fecal corticosterone, body mass, and caching rates of Carolina chickadees (*Poecile carolinensis*) from disturbed and undisturbed sites. *Horm. Behav.* **49**, 634–643.
- Madliger, C. L. and Love, O. P.** (2016a). Conservation implications of a lack of relationship between baseline glucocorticoids and fitness in a wild passerine. *Ecol. Appl.* **26**, 2730–2743.
- Madliger, C. L. and Love, O. P.** (2016b). Do baseline glucocorticoids simultaneously represent fitness and environmental quality in a declining aerial insectivore? *Oikos* **125**, 1824–1837.
- Madliger, C. L., Semeniuk, C. A. D., Harris, C. M. and Love, O. P.** (2015). Assessing baseline stress physiology as an integrator of environmental quality in a wild avian population: Implications for use as a conservation biomarker. *Biol. Conserv.* **192**, 409–417.
- Martin, L. B., Gilliam, J., Han, P., Lee, K. and Wikelski, M.** (2005). Corticosterone suppresses cutaneous immune function in temperate but not tropical house sparrows, *Passer domesticus*. *Gen. Comp. Endocrinol.* **140**, 126–135.
- Miller, D. A., Vleck, C. M. and Otis, D. L.** (2009). Variation in baseline and stress-induced corticosterone and prolactin levels predicts parental effort by nesting mourning doves. *Horm. Behav.* **56**, 457–464.
- Nager, R. G.** (2006). The challenges of making eggs. *Ardea* **94**, 323–346.

- Newman, A. E. M., MacDougall-Shackleton, S. A., An, Y.-S., Kriengwatana, B. and Soma, K. K.** (2010). Corticosterone and dehydroepiandrosterone have opposing effects on adult neuroplasticity in the avian song control system. *J. Comp. Neurol.* **518**, 3662–3678.
- Nilsson J-Å and Råberg L.** (2001). The resting metabolic cost of egg laying and nestling feeding in great tits. *Oecologia* **128**, 187–192.
- Nomi, D.** (2018). Male feeding contribution facilitates multiple brooding in a biparental songbird. *Ibis* **160**, 293–300.
- Ouyang, J. Q., Hau, M. and Bonier, F.** (2011). Within seasons and among years: When are corticosterone levels repeatable? *Horm. Behav.* **60**, 559–564.
- Ouyang, J. Q., Lendvai, Á. Z., Dakin, R., Domalik, A. D., Fasanello, V. J., Vassallo, B. G., Haussmann, M. F., Moore, I. T. and Bonier, F.** (2015). Weathering the storm: parental effort and experimental manipulation of stress hormones predict brood survival. *BMC Evol. Biol.* **15**, 1–8. DOI: 10.1186/s12862-015-0497-8.
- Ouyang, J. Q., Muturi, M., Quetting, M. and Hau, M.** (2013). Small increases in corticosterone before the breeding season increase parental investment but not fitness in a wild passerine bird. *Horm. Behav.* **63**, 776–781.
- Ouyang, J. Q., Sharp, P. J., Dawson, A., Quetting, M. and Hau, M.** (2011). Hormone levels predict individual differences in reproductive success in a passerine bird. *Proc. R. Soc. B* **278**, 2537–2545.
- Pakkala, J. J., Norris, D. R., Sedinger, J. S. and Newman, A. E. M.** (2016). Experimental effects of early-life corticosterone on the hypothalamic – pituitary – adrenal axis and pre-migratory behaviour in a wild songbird. *Funct. Ecol.* **30**, 1149–1160.
- Patterson, S. H., Hahn, T. P., Cornelius, J. M. and Breuner, C. W.** (2014). Natural selection



- and glucocorticoid physiology. *J. Evol. Biol.* **27**, 259–274.
- Patterson, S. H., Winkler, D. W. and Breuner, C. W.** (2011). Glucocorticoids, individual quality and reproductive investment in a passerine bird. *Anim. Behav.* **81**, 1239–1247.
- Perneger, T. V.** (1998). What’s wrong with Bonferroni adjustments. *Brit. Med. J.* **316**, 1236–1238.
- Pitk, M., Tilgar, V., Kilgas, P. and Mänd, R.** (2012). Acute stress affects the corticosterone level in bird eggs: A case study with great tits (*Parus major*). *Horm. Behav.* **62**, 475–479.
- Pyle, P., Howell, S. N. G., Yuick, R. P. and DeSante, D. F.** (1987). *Identification Guide to North American Passerines*. Bolinas, USA: Slate Creek Press.
- Riechert, J., Becker, P. H. and Chastel, O.** (2014). Predicting reproductive success from hormone concentrations in the common tern (*Sterna hirundo*) while considering food abundance. *Oecologia* **176**, 715–727.
- Rivers, J. W., Newberry, G. N., Schwarz, C. J. and Ardia, D. R.** (2017). Success despite the stress: Violet-green swallows increase glucocorticoids and maintain reproductive output despite experimental increases in flight costs. *Funct. Ecol.* **31**, 235–244.
- Robertson, B. D., Newman, A. E. M. and MacDougall-Shackleton, S. A.** (2015). Perils and pitfalls of manipulating glucocorticoids with silicone implants. *Integr. Comp. Biol.* **55**, E154.
- Romero, L. M.** (2002). Seasonal changes in plasma glucocorticoid concentrations in free-living vertebrates. *Gen. Comp. Endocrinol.* **128**, 1–24.
- Romero, L. M.** (2004). Physiological stress in ecology: lessons from biomedical research. *Trends Ecol. Evol.* **19**, 249–255.
- Romero, L. M. and Fairhurst, G. D.** (2016). Measuring corticosterone in feathers□: Strengths,

- limitations, and suggestions for the future. *Comp. Biochem. Physiol. A.* **202**, 112–122.
- Saino, N., Romano, M., Ferrari, R. P., Martinelli, R. and Møller, A. P.** (2005). Stressed mothers lay eggs with high corticosterone levels which produce low-quality offspring. *J. Exp. Zool. A.* **303**, 998–1006.
- Sakaluk, S. K., Thompson, C. F. and Bowers, E. K.** (2018). Experimental manipulation of incubation period reveals no apparent costs of incubation in house wrens. *Anim. Behav.* **137**, 169–177.
- Sapolsky, R. M., Romero, L. M. and Munck, A. U.** (2000). How do glucocorticoids influence stress responses? Integrating permissive, suppressive, stimulatory, and preparative actions. *Endocr. Rev.* **21**, 55–89.
- Schoech, S. J., Bowman, R., Bridge, E. S. and Boughton, R. K.** (2007). Baseline and acute levels of corticosterone in Florida scrub-jays (*Aphelocoma coerulescens*): effects of food supplementation, suburban habitat, and year. *Gen. Comp. Endocrinol.* **154**, 150–160.
- Schoenle, L. A., Dudek, A. M., Moore, I. T. and Bonier, F.** (2017). Red-winged blackbirds (*Agelaius phoeniceus*) with higher baseline glucocorticoids also invest less in incubation and clutch mass. *Horm. Behav.* **90**, 1–7.
- Schoenle, L. A., Zimmer, C., Miller, E. T. and Vitousek, M. N.** (2019). Does variation in glucocorticoid regulation predict fitness? A phylogenetic meta-analysis. *bioRxiv* doi: 10.1101/649608
- Shitikov, D. A., Vaytina, T. M., Makarova, T. V., Fedotova, S. E., Krasnykh, N. A., Yurchenko, Y.A.** (2017). Breeding success affects the apparent survival of grassland passerines. *Biol. Bull.* **44**, 1046–1055.
- Sorenson, G. H., Dey, C. J., Madliger, C. L. and Love, O. P.** (2017). Effectiveness of baseline corticosterone as a monitoring tool for fitness: a meta-analysis in seabirds. *Oecologia* **183**,

353–365.

**Streiner D. L.** (2015). Best (but oft-forgotten) practices: the multiple problems of multiplicity — whether and how to correct for many statistical tests. *Amer. J. Clin. Nutr.* **102**, 721–728.

**Thierry, A. -M., Ropert-Coudert, Y. and Raclot, T.** (2013). Elevated corticosterone levels decrease reproductive output of chick-rearing Adélie penguins but do not affect chick mass at fledging. *Conserv. Physiol.* **1**, 1–12. doi: 10.1093/conphys/cot007.

**Torres-Medina, F., Cabezas, S., Marchant, T. A., Wikelski, M., Romero, L. M., Hau, M., Carrete, M., Tella, J. L. and Blas, J.** (2018). Corticosterone implants produce stress-hyporesponsive birds. *J. Exp. Biol.* **221**, jeb173864. doi:10.1242/jeb.173864.

**Tulp, I., Bruinzeel, L. W., Jukema, J. and Visser, G. H.** (2009). Energetic demands during incubation and chick rearing in a uniparental and a biparental shorebird breeding in the high arctic. *Auk* **126**, 155–164.

**Vitousek, M. N., Jenkins, B. R. and Safran, R. J.** (2014). Stress and success: individual differences in the glucocorticoid stress response predict behavior and reproductive success under high predation risk. *Horm. Behav.* **66**, 812–819.

**Vitousek, M. N., Taff, C. C., Hallinger, K. K. and Zimmer, C.** (2018). Hormones and fitness: evidence for trade-offs in glucocorticoid regulation across contexts. *Front. Ecol. Evol.* **6**, 1–14. doi: 10.3389/fevo.2018.00042.

**Washburn, B. E., Morris, D. L., Millsbaugh, J. J., Faaborg, J. and Schulz, J. H.** (2002). Using a commercially available radioimmunoassay to quantify corticosterone in avian plasma. *Condor* **104**, 558–563.

**Weegman, M. D., Arnold, T. W., Dawson, R. D., Winkler, D. W. and Clark, R. G.** (2017). Integrated population models reveal local weather conditions are the key drivers of

population dynamics in an aerial insectivore. *Oecologia* **185**, 119–130.

**Whittingham, L. A., Dunn, P. O. and Clotfelter, E. D.** (2003). Parental allocation of food to nestling tree swallows: the influence of nestling behaviour, sex and paternity. *Anim. Behav.* **65**, 1203–1210.

**Wilcoxon, T. E., Boughton, R. K., Bridge, E. S., Rensel, M. A. and Schoech, S. J.** (2011). Age-related differences in baseline and stress-induced corticosterone in Florida scrub-jays. *Gen. Comp. Endocrinol.* **173**, 461–466.

**Williams, T. D.** (2005). Mechanisms underlying the costs of egg production. *BioScience* **55**, 39–48.

**Williams, T. D.** (2018). Physiology, activity and costs of parental care in birds. *J. Exp. Biol.* **221**, jeb169433. doi: 10.1242/jeb.169433.

**Wingfield, J. C., Maney, D. L., Breuner, C. W., Jacobs, J. D., Lynn, S., Ramenofsky, M. and Richardson, R. D.** (1998). Ecological bases of hormone-behavior interactions: The “emergency life history stage.” *Am. Zool.* **206**, 191–206.

**Wingfield, J. C. and Sapolsky, R. M.** (2003). Reproduction and resistance to stress: when and how. *J. Neuroendocrinol.* **15**, 711–724.

**Wingfield, J. C., Weimerskirch, H. and Chastel, O.** (2010). Hormonal correlates of individual quality in a long-lived bird: a test of the ‘corticosterone – fitness hypothesis.’ *Biol. Lett.* **6**, 846–849.

**Winkler, D. W., Hallinger, K. K., Ardia, D. R., Robertson, R. J., Stutchbury, B. J. and Cohen, R. R.** (2011). Tree Swallow (*Tachycineta bicolor*). *The Birds of North America* (ed. P.G. Rodewald). New York: Cornell Lab of Ornithology.

**Table 1. Sample sizes of adult female tree swallows allocated to each maternal treatment group across two years.**

|                                               | Sham  |         | CORT  |        | Control |     |
|-----------------------------------------------|-------|---------|-------|--------|---------|-----|
|                                               | SY    | ASY     | SY    | ASY    | SY      | ASY |
| Number of females implanted                   | 16    | 27      | 18    | 26     | -       | -   |
| Number of females that laid                   | 3 (9) | 17 (24) | 5 (6) | 9 (18) | 11      | 10  |
| Number of females that laid eggs that hatched | 2 (7) | 16 (23) | 4 (5) | 9 (16) | 8       | 10  |

Sham: females had an empty silastic implant; CORT: females had a silastic implant filled with crystalline corticosterone; Control: females had no implant.

Female age: SY (second-year); ASY (after second-year).

Bracketed values represent total number of individuals handled/implanted; non-bracketed values indicate sample sizes of birds with implants that were still present when the bird was recaptured during incubation.

Four females of unknown age are omitted from the table (1 CORT, 1 Sham, 2 Controls)

**Table 2. Factors contributing to variation in corticosterone levels in female tree swallows during incubation (CORTinc) and the nestling stage (CORTnest).**

| Response variable   | Fixed effects      | $\beta$ | SE    | df    | t      | P            | R <sup>2</sup> |
|---------------------|--------------------|---------|-------|-------|--------|--------------|----------------|
| CORTinc<br>(ng/ml)  | Intercept          | 2.753   | 3.578 | 1, 38 | 0.769  | 0.447        | 0.227          |
|                     | Treatment (CORT)   | -0.611  | 0.315 | 1, 38 | -1.943 | 0.060        |                |
|                     | Treatment (Sham)   | -0.366  | 0.276 | 1, 38 | -1.325 | 0.193        |                |
|                     | Age (ASY)          | 0.770   | 0.327 | 1, 38 | 2.358  | <b>0.024</b> |                |
|                     | Lay date           | 0.000   | 0.025 | 1, 38 | 0.008  | 0.993        |                |
|                     | Site (Nature Area) | -0.459  | 0.255 | 1, 38 | -1.800 | 0.080        |                |
|                     | Sample time        | -0.005  | 0.004 | 1, 38 | -1.233 | 0.225        |                |
|                     | Year               | -0.755  | 0.291 | 1, 38 | -2.591 | <b>0.014</b> |                |
| CORTnest<br>(ng/ml) | Intercept          | 2.834   | 4.272 | 1, 17 | 0.664  | 0.516        | 0.071          |
|                     | Treatment (CORT)   | 0.593   | 0.369 | 1, 17 | 1.610  | 0.126        |                |
|                     | Treatment (Sham)   | 0.218   | 0.292 | 1, 17 | 0.748  | 0.465        |                |
|                     | Age (ASY)          | 0.086   | 0.489 | 1, 17 | 0.176  | 0.862        |                |
|                     | Lay date           | -0.005  | 0.028 | 1, 17 | -0.163 | 0.872        |                |
|                     | Site (Nature Area) | 0.336   | 0.362 | 1, 17 | 0.926  | 0.367        |                |
|                     | Sample time        | 0.002   | 0.004 | 1, 17 | 0.638  | 0.532        |                |

Year was not included for CORTnest, because data were collected in a single year.  
 Statistically significant main effects are in bold.

**Table 3. Factors contributing to variation in reproductive investment in female tree swallows.**

| Measures of maternal investment                                          | Fixed effects                  | $\beta$ | SE    | df          | t      | P                | R <sup>2</sup> |
|--------------------------------------------------------------------------|--------------------------------|---------|-------|-------------|--------|------------------|----------------|
| Clutch mass (g)                                                          | Intercept                      | 7.712   | 1.295 | 1, 35       | 5.954  | <0.001           | 0.127          |
|                                                                          | CORTinc                        | 0.139   | 0.457 | 1, 35       | 0.305  | 0.762            |                |
|                                                                          | Treatment (CORT)               | 0.368   | 0.848 | 1, 35       | 0.434  | 0.667            |                |
|                                                                          | Treatment (Sham)               | 0.540   | 0.761 | 1, 35       | 0.709  | 0.483            |                |
|                                                                          | Maternal age (ASY)             | 1.514   | 0.733 | 1, 35       | 2.064  | <b>0.047</b>     |                |
|                                                                          | Site (Nature Area)             | -0.936  | 0.656 | 1, 35       | -1.427 | 0.162            |                |
|                                                                          | Year                           | -0.407  | 0.635 | 1, 35       | -0.640 | 0.526            |                |
| Nest box visits (per chick per hour)                                     | Intercept                      | 2.697   | 1.451 | 1, 16       | 1.858  | 0.082            | 0.101          |
|                                                                          | CORTnest                       | -0.382  | 0.476 | 1, 16       | -0.802 | 0.434            |                |
|                                                                          | Treatment (CORT)               | 0.295   | 0.759 | 1, 16       | 0.388  | 0.703            |                |
|                                                                          | Treatment (Sham)               | -0.292  | 0.637 | 1, 16       | -0.459 | 0.653            |                |
|                                                                          | Site (Nature Area)             | 0.696   | 0.640 | 1, 16       | 1.087  | 0.293            |                |
|                                                                          | Male visits per chick per hour | 0.569   | 0.293 | 1, 16       | 1.938  | 0.070            |                |
|                                                                          | Maternal age (ASY)             | 0.131   | 0.662 | 1, 16       | 0.198  | 0.846            |                |
| Growth rate (mass gain per chick per day from day 3 to day 7 post-hatch) | Intercept                      | 3.619   | 0.390 | 1, 43.662   | 9.279  | <0.001           | (M)            |
|                                                                          | CORTnest                       | -0.250  | 0.145 | 1, 42.800   | -1.722 | 0.092            | 0.271          |
|                                                                          | Treatment (CORT)               | 0.104   | 0.202 | 1, 21.465   | 0.516  | 0.611            | (C)            |
|                                                                          | Treatment (Sham)               | 0.135   | 0.193 | 1, 22.072   | 0.698  | 0.492            | 0.579          |
|                                                                          | Site (Nature Area)             | 0.226   | 0.177 | 1, 25.404   | 1.279  | 0.212            |                |
|                                                                          | Maternal age (ASY)             | -0.859  | 0.217 | 1, 23.692   | -3.957 | <b>&lt;0.001</b> |                |
|                                                                          | Nestling sex (male)            | -0.149  | 0.347 | 1, 110.4111 | -0.430 | 0.668            |                |
|                                                                          | CORTnest x nestling sex        | 0.102   | 0.138 | 1, 110.421  | 0.739  | 0.461            |                |

CORTinc and CORTnest refer to maternal CORT levels during incubation and the nestling stage, respectively.

Year was not included in analyses of Nest box visits or Growth rate, because CORTnest was measured in a single year only.

Adjusted R<sup>2</sup> values are provided for models without random effects; marginal (M) and conditional (C) R<sup>2</sup> values are provided for models with random effects.

Statistically significant main effects are in bold.

**Table 4. Factors contributing to variation in reproductive success in female tree swallows.**

| Measures of maternal reproductive success | Fixed effects      | $\beta$ | SE    | df        | z or t | P            | R <sup>2</sup> |
|-------------------------------------------|--------------------|---------|-------|-----------|--------|--------------|----------------|
| Hatching success                          | Intercept          | -0.831  | 1.046 | 1, 263    | -0.795 | 0.427        | (M) 0.220      |
|                                           | CORTinc            | 0.969   | 0.378 | 1, 263    | 2.563  | <b>0.010</b> | (C) 0.461      |
|                                           | Treatment (CORT)   | 1.260   | 0.744 | 1, 263    | 1.694  | 0.090        |                |
|                                           | Treatment (Sham)   | 0.418   | 0.688 | 1, 263    | 0.609  | 0.543        |                |
|                                           | Site (Nature Area) | -0.818  | 0.572 | 1, 263    | -1.430 | 0.153        |                |
|                                           | Year               | -0.285  | 0.530 | 1, 263    | -0.538 | 0.591        |                |
|                                           | Age (ASY)          | 0.599   | 0.598 | 1, 263    | 1.002  | 0.316        |                |
| Nestling mass at day 14 post-hatch        | Intercept          | 22.219  | 0.963 | 1, 29.767 | 23.082 | <0.001       | (M) 0.086      |
|                                           | CORTnest           | -0.587  | 0.363 | 1, 26.735 | -1.618 | 0.117        | (C) 0.239      |
|                                           | Treatment (CORT)   | 0.291   | 0.592 | 1, 22.059 | 0.492  | 0.628        |                |
|                                           | Treatment (Sham)   | -0.356  | 0.575 | 1, 21.742 | -0.619 | 0.543        |                |
|                                           | Site (Nature Area) | 0.972   | 0.503 | 1, 27.232 | 1.934  | 0.064        |                |
|                                           | Age (ASY)          | 0.226   | 0.600 | 1, 27.066 | 0.376  | 0.710        |                |
| Fledging success A                        | Intercept          | -2.437  | 1.450 | 1, 228    | -1.681 | 0.093        | (M) 0.333      |
|                                           | CORTinc            | 1.448   | 0.551 | 1, 228    | 2.627  | <b>0.009</b> | (C) 0.670      |
|                                           | Treatment (CORT)   | 0.916   | 0.998 | 1, 228    | 0.918  | 0.359        |                |
|                                           | Treatment (Sham)   | 0.538   | 0.927 | 1, 228    | 0.580  | 0.562        |                |
|                                           | Site (Nature Area) | -1.542  | 0.826 | 1, 228    | -1.868 | 0.062        |                |
|                                           | Age (ASY)          | 1.029   | 0.849 | 1, 228    | 1.212  | 0.225        |                |
|                                           | Year               | -0.491  | 0.684 | 1, 228    | -0.718 | 0.473        |                |
| Fledging success B                        | Intercept          | 6.423   | 2.922 | 1, 144    | 2.198  | 0.028        | (M) 0.186      |
|                                           | CORTnest           | -2.029  | 1.078 | 1, 144    | -1.883 | 0.060        | (C) 0.591      |
|                                           | Treatment (CORT)   | 0.207   | 1.295 | 1, 144    | 0.160  | 0.873        |                |
|                                           | Treatment (Sham)   | -0.653  | 1.190 | 1, 144    | -0.549 | 0.583        |                |
|                                           | Site (Nature Area) | -0.325  | 1.202 | 1, 144    | -0.270 | 0.787        |                |
|                                           | Age (ASY)          | 0.819   | 1.461 | 1, 144    | 0.561  | 0.576        |                |

Each model includes Maternal ID as a random effect; marginal (M) and conditional (C) R<sup>2</sup> values are provided.



There were two analyses of Fledging success (A and B), with predictors including either **CORTinc** or **CORTnest**, respectively.  
Year was not included in analyses of Nestling mass at day 14 or Fledging success B, because **CORTnest** was measured in a single year only.  
Statistically significant main effects are in bold.

**Table 5. Factors predicting the return rate in female tree swallows in the following year.**

| Response variable | Fixed effects        | $\beta$ | SE    | df    | z      | P     |
|-------------------|----------------------|---------|-------|-------|--------|-------|
| Return rate A     | Intercept            | -3.738  | 1.686 | 1, 34 | -2.217 | 0.027 |
|                   | CORTinc              | 1.177   | 0.612 | 1, 34 | 1.925  | 0.054 |
|                   | Treatment (CORT)     | 1.104   | 1.063 | 1, 34 | 1.038  | 0.299 |
|                   | Treatment (Sham)     | 1.049   | 0.962 | 1, 34 | 1.091  | 0.275 |
|                   | Number of fledglings | 0.538   | 0.281 | 1, 34 | 1.913  | 0.056 |
|                   | Year                 | 0.240   | 0.820 | 1, 34 | 0.293  | 0.769 |
|                   | Age (ASY)            | -2.077  | 1.069 | 1, 34 | -1.943 | 0.052 |
|                   | Site (Nature Area)   | 0.758   | 0.939 | 1, 34 | 0.808  | 0.419 |
| Return rate B     | Intercept            | -2.562  | 3.211 | 1, 15 | -0.798 | 0.425 |
|                   | CORTnest             | 0.337   | 1.066 | 1, 15 | 0.317  | 0.752 |
|                   | Treatment (CORT)     | 0.579   | 1.678 | 1, 15 | 0.345  | 0.730 |
|                   | Treatment (Sham)     | 0.570   | 1.262 | 1, 15 | 0.452  | 0.651 |
|                   | Number of fledglings | 0.636   | 0.409 | 1, 15 | 1.557  | 0.119 |
|                   | Age (ASY)            | -0.730  | 1.545 | 1, 15 | -0.472 | 0.637 |
|                   | Site (Nature Area)   | 1.073   | 1.542 | 1, 15 | 0.696  | 0.487 |

There were two analyses of Return rate (A and B), with predictors including either CORTinc or CORTnest, respectively.

Year was not included in analyses of Return rate B, because CORTnest was measure in one year only.

Statistically significant main effects are in bold.

## Figure legend

**Figure 1.** There was no significant difference among treatments in plasma corticosterone levels of female tree swallows when measured during (A) incubation and (B) nestling stage. Individuals in the CORT treatment had a single silastic implant containing crystalline corticosterone, those in the Sham treatment had an empty implant, while Control birds had no implant. The black circle indicates the mean; the thick horizontal line is the median. Individual data points are shown.

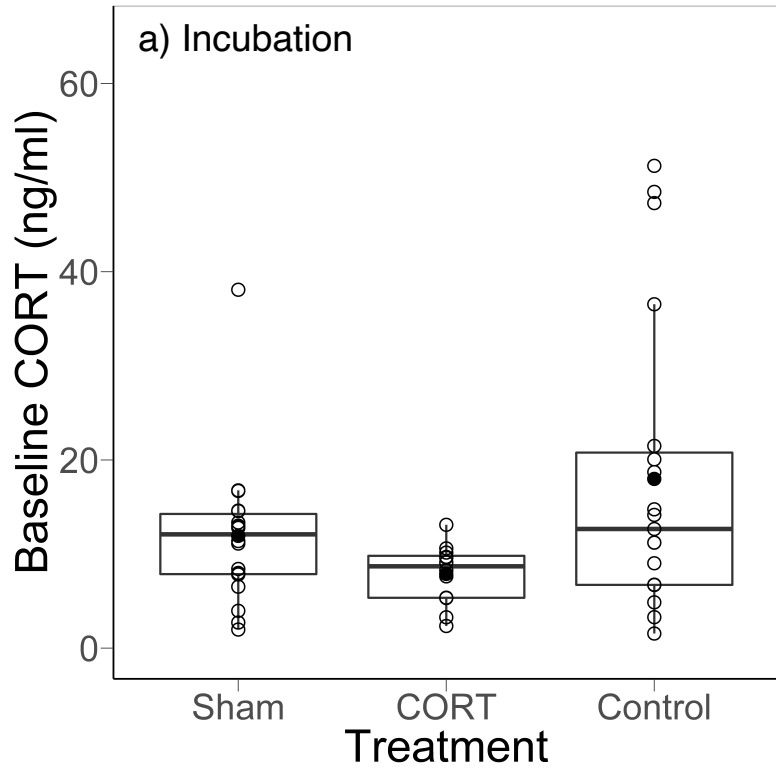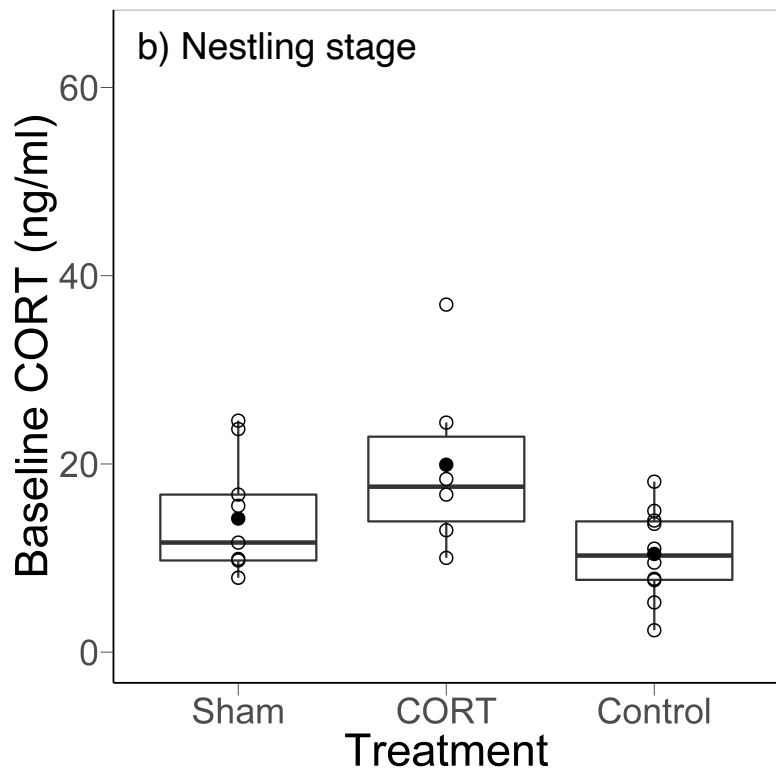

Source: http://biorxiv.org/content/10.1101/685891v2.full.pdf
